# Supplementary material for: Transcriptome Analysis of Monocytes and Fibroblasts Provides Insights Into the Molecular Features of Periodontal Ehlers-Danlos Syndrome
Source: Front Genet. 2022 Apr 28;13:834928. doi: 10.3389/fgene.2022.834928 (PMC9095904; doi:10.3389/fgene.2022.834928)
Supplement: Supplementary file 10 [file DataSheet2.CSV]

gene_id	gene_name	normal1	normal2	normal3	pEDS1	pEDS2
ENSG00000000003	TSPAN6	102	84	105	66	74
ENSG00000000419	DPM1	28.09	25.46	47.63	28.74	17.03
ENSG00000000457	SCYL3	83.36	54.97	87.36	60.92	66
ENSG00000000460	C1orf112	16.57	183.16	10.6	64.93	24.72
ENSG00000000938	FGR	1	1	1	0	0
ENSG00000000971	CFH	1190.66	517.59	1680.67	678.65	394.62
ENSG00000001036	FUCA2	1118	1752	1341	1397	965
ENSG00000001167	NFYA	72.96	140.27	70.02	116	74
ENSG00000001460	STPG1	21.41	18.47	12.7	11.01	18.37
ENSG00000001461	NIPAL3	338.28	578.55	423.84	384.36	478.36
ENSG00000001497	LAS1L	21.84	224.91	62.14	91.13	108.21
ENSG00000001561	ENPP4	14	26	16	24	29
ENSG00000001617	SEMA3F	38.44	32.35	0	0	7.07
ENSG00000001629	ANKIB1	839.82	694.44	989	845.82	740.54
ENSG00000001630	CYP51A1	439.65	319.66	840	869	379
ENSG00000001631	KRIT1	64.91	48.74	77.54	80.16	90.8
ENSG00000002016	RAD52	12.74	26.29	17.25	16.81	16.28
ENSG00000002330	BAD	103	147.44	102.89	106.18	78.31
ENSG00000002549	LAP3	321.5	620.15	790.5	454	324
ENSG00000002586	CD99	571.92	308.23	469.62	361.02	270.15
ENSG00000002746	HECW1	195	255	235	164	129
ENSG00000002822	MAD1L1	149.63	202.46	99.95	139.87	128.35
ENSG00000002834	LASP1	844.5	1270.47	908.49	949.34	777.5
ENSG00000002919	SNX11	0	52.45	42.48	21.74	0
ENSG00000003137	CYP26B1	70.01	24.84	164.75	8.68	20
ENSG00000003249	DBNDD1	3	3	2	0	0
ENSG00000003393	ALS2	479.79	617.53	594.04	667.74	568.57
ENSG00000003402	CFLAR	152.82	62.85	84.93	96.4	80.09
ENSG00000003436	TFPI	89.54	86.01	189.74	187.12	94.61
ENSG00000003509	NDUFAF7	64.93	102.32	74.21	69.82	84.07
ENSG00000003756	RBM5	1227.17	892.74	1017.43	882.8	852.73
ENSG00000003987	MTMR7	1	0	0	2	2
ENSG00000003989	SLC7A2	0	16	9.15	28	8.5
ENSG00000004059	ARF5	350	417	361.25	337	325.48
ENSG00000004139	SARM1	164	114.29	157.81	159.77	108.64
ENSG00000004142	POLDIP2	628.96	1359	915	869	650
ENSG00000004399	PLXND1	5033.33	1527.12	1532.33	1351.07	1371.89
ENSG00000004455	AK2	2.95	7.3	0	1.24	0
ENSG00000004478	FKBP4	248	1059	382	476	272
ENSG00000004487	KDM1A	650.84	1131.79	738.62	594.44	535.9
ENSG00000004534	RBM6	152.71	90.54	99.74	94.95	95.15
ENSG00000004660	CAMKK1	0	64.85	15	8.07	0
ENSG00000004700	RECQL	273.16	393.77	319.73	411.46	421
ENSG00000004776	HSPB6	24.87	37.12	38.43	10.98	39.01
ENSG00000004777	ARHGAP33	41.34	95.44	24.09	31.49	36.5
ENSG00000004779	NDUFAB1	107	298	194	200.5	153
ENSG00000004864	SLC25A13	0	14.76	7.26	17.68	4.3
ENSG00000004866	ST7	0	54.41	14.74	0	16.92
ENSG00000004897	CDC27	312.44	412.13	342.7	390.68	301.56
ENSG00000004961	HCCS	34.33	77	49.33	59.67	47.67
ENSG00000004975	DVL2	1015.71	709.31	805.91	835.5	601.53
ENSG00000005007	UPF1	1924.2	1844.83	1258.84	1198.76	1272.4
ENSG00000005020	SKAP2	46	31	35	26	38
ENSG00000005022	SLC25A5	707	3074	1236	1685	1151
ENSG00000005059	MCUB	159	233	128	200	264
ENSG00000005075	POLR2J	104.88	218.91	128.13	134.51	120.98
ENSG00000005100	DHX33	110.56	281.91	167.38	193.89	157.43
ENSG00000005156	LIG3	159.28	435.17	261.99	276.39	260
ENSG00000005175	RPAP3	225.87	177.39	312	293.05	184.66
ENSG00000005187	ACSM3	0	5	1.12	6	0
ENSG00000005189	REXO5	9.72	34.8	0	6.21	16.16
ENSG00000005194	CIAPIN1	17.06	52.74	32.33	31.85	19.86
ENSG00000005206	SPPL2B	291.18	381.16	356.85	320.16	312.84
ENSG00000005238	FAM214B	51.67	93	56.02	64.5	64.84
ENSG00000005243	COPZ2	267.35	432.11	345.68	446.44	524.28
ENSG00000005249	PRKAR2B	91	103	183	108	173
ENSG00000005302	MSL3	218.73	264.76	218.63	203.17	233.19
ENSG00000005339	CREBBP	1961.54	1658.84	1446.97	1469.38	1918.13
ENSG00000005379	TSPOAP1	14.54	2.43	12.52	4.2	10
ENSG00000005436	GCFC2	2.2	0	3.63	19.83	0
ENSG00000005448	WDR54	114.57	239.16	134	174.01	97.41
ENSG00000005469	CROT	109.2	137.56	149.87	109.59	182.73
ENSG00000005471	ABCB4	59.73	10.05	39.15	20.73	11.48
ENSG00000005483	KMT2E	596.5	373.14	506.31	524.23	492.48
ENSG00000005486	RHBDD2	2.42	16.17	23.4	21.86	0
ENSG00000005513	SOX8	12	1	0	0	1
ENSG00000005700	IBTK	806.18	613.3	1055.79	1053.05	907.76
ENSG00000005812	FBXL3	575.62	289.08	310.16	359.77	395.84
ENSG00000005882	PDK2	229.02	243.32	188.83	176.97	270.03
ENSG00000005884	ITGA3	416	4692.57	2098.32	1591.54	1104
ENSG00000005889	ZFX	18.49	0	34.71	10.25	46.75
ENSG00000005893	LAMP2	1206	768.9	1147.95	1101.68	950.82
ENSG00000005961	ITGA2B	0	2	4	0	1
ENSG00000006007	GDE1	575.45	455.11	579.09	474.58	388.82
ENSG00000006015	REX1BD	36.79	70.56	70.99	79.11	44.34
ENSG00000006016	CRLF1	44	39	0	10	399
ENSG00000006025	OSBPL7	47.5	33.75	32.06	13	13
ENSG00000006042	TMEM98	399.68	188.8	226.27	189.59	182
ENSG00000006062	MAP3K14	72	106.78	49	46.5	42
ENSG00000006118	TMEM132A	682.78	599.76	1031.03	440.99	249.4
ENSG00000006125	AP2B1	1390.43	1593.8	1539.4	1396.31	1041.15
ENSG00000006194	ZNF263	102.6	90.76	88.76	43.2	61.69
ENSG00000006282	SPATA20	335.21	393.58	150.63	189.01	0
ENSG00000006327	TNFRSF12A	1	5.02	9	2.01	2
ENSG00000006451	RALA	275.14	245.29	312.13	282.33	353
ENSG00000006453	BAIAP2L1	19	46	37	42	25
ENSG00000006459	KDM7A	46	9.71	46	61	62.96
ENSG00000006468	ETV1	88.47	66.42	23.29	55.95	132.55
ENSG00000006530	AGK	27.4	55.03	32.27	44.96	44.55
ENSG00000006534	ALDH3B1	157.28	148.01	198.58	315.32	255.86
ENSG00000006576	PHTF2	273.57	317.94	232.31	393.48	328.7
ENSG00000006607	FARP2	215.36	67.3	83.14	104.05	154.2
ENSG00000006634	DBF4	58.16	294	75	170.69	121.42
ENSG00000006638	TBXA2R	34.91	38.51	14.44	15.58	10.73
ENSG00000006695	COX10	24.58	55.15	62.5	42	38.27
ENSG00000006704	GTF2IRD1	201.7	199.93	160.5	201.17	174.97
ENSG00000006712	PAF1	518.88	944.62	589.92	575.46	508.94
ENSG00000006715	VPS41	713.42	554.9	873.71	780.02	600.27
ENSG00000006740	ARHGAP44	5.07	0	0	3.29	1.64
ENSG00000006744	ELAC2	585.74	1715.8	706.91	776.92	719.78
ENSG00000006756	ARSD	233	87	239	235	291
ENSG00000006757	PNPLA4	7.35	22.58	46.82	28.54	37.58
ENSG00000006831	ADIPOR2	289	348	359	318	221
ENSG00000006837	CDKL3	0.63	0	0	0.77	0.16
ENSG00000007047	MARK4	558.86	581.22	623.39	619	489.24
ENSG00000007080	CCDC124	116.19	296.12	181.73	210.78	167.04
ENSG00000007168	PAFAH1B1	756	1020.26	826	902	801.18
ENSG00000007202	KIAA0100	2951.18	3732.79	2890.34	3175.19	2560.7
ENSG00000007255	TRAPPC6A	18.59	7.6	11.93	4.74	7.18
ENSG00000007341	ST7L	1.17	0	14.31	0	0.16
ENSG00000007376	RPUSD1	54.93	117.97	79.4	84.07	52.6
ENSG00000007384	RHBDF1	1182	1117.97	1328	1177	1011
ENSG00000007392	LUC7L	222.45	315	273.59	257.83	249.91
ENSG00000007520	TSR3	508	1077	765	796	610
ENSG00000007541	PIGQ	26.01	85.62	53.8	52.29	46.56
ENSG00000007545	CRAMP1	173	121	133	117.08	129.83
ENSG00000007866	TEAD3	391.81	446.88	567.48	532.85	351.34
ENSG00000007923	DNAJC11	343	803.98	450.15	463.61	322.87
ENSG00000007933	FMO3	278	75	167	30	1
ENSG00000007944	MYLIP	218	80.11	131.6	154	98
ENSG00000007968	E2F2	1	47	7	20	13
ENSG00000008018	PSMB1	786	1395	1297	1131	788
ENSG00000008056	SYN1	1	6	4	1	1
ENSG00000008083	JARID2	120.75	100.47	194	187.51	139
ENSG00000008086	CDKL5	76	44.54	107	73.64	61.93
ENSG00000008128	CDK11A	134.61	0	112.46	54.65	95.25
ENSG00000008226	DLEC1	1	3	1	4	1
ENSG00000008282	SYPL1	140.66	250.02	331.22	193.96	299.33
ENSG00000008283	CYB561	0	1.12	4.48	0	1.72
ENSG00000008294	SPAG9	264.29	334.88	196.41	348.36	203.92
ENSG00000008300	CELSR3	155	62	180	124	108
ENSG00000008311	AASS	140	71.45	78.6	73.08	66.42
ENSG00000008324	SS18L2	1	1.5	1	4.5	1.5
ENSG00000008394	MGST1	18.5	44.64	70.07	47.84	107.49
ENSG00000008405	CRY1	166	203	193	248.99	256.54
ENSG00000008441	NFIX	111.24	27.28	0	39.91	144.67
ENSG00000008513	ST3GAL1	55.75	37.65	60.25	53.25	65.5
ENSG00000008517	IL32	2.41	0	8.69	5.15	0.99
ENSG00000008710	PKD1	7972.63	4698.83	6351.08	7009.7	9200.17
ENSG00000008735	MAPK8IP2	25	8	4	13	11
ENSG00000008869	HEATR5B	484	394	476	426	429
ENSG00000008952	SEC62	441.47	246	497.5	533	416.68
ENSG00000009335	UBE3C	1430	2453.05	1769	1874	1500
ENSG00000009413	REV3L	1013.02	51.95	350.67	363.59	467.31
ENSG00000009724	MASP2	29	4	6	6	12
ENSG00000009780	FAM76A	20.24	38.77	36.61	65.04	47.93
ENSG00000009830	POMT2	154.51	403.99	268.57	359.44	280.25
ENSG00000009844	VTA1	225.04	454.3	318.58	380.24	394.69
ENSG00000009954	BAZ1B	1025	1161.5	852	990.5	839
ENSG00000010017	RANBP9	617	719	725	914	1071
ENSG00000010030	ETV7	12.38	0.78	0	0	2.59
ENSG00000010072	SPRTN	93.05	136.85	82.02	86.68	59.38
ENSG00000010165	EEF1AKNMT	395	793	479	571	394
ENSG00000010219	DYRK4	42.35	35.23	47.49	28.21	35.4
ENSG00000010244	ZNF207	368.19	799.08	475.7	496.15	439.78
ENSG00000010256	UQCRC1	1693	3436	2711	2409	1565
ENSG00000010270	STARD3NL	54.5	106.58	70.95	66.16	60.31
ENSG00000010278	CD9	671.17	241.02	208.74	277.13	379.7
ENSG00000010292	NCAPD2	731.58	4855.49	642.17	1868.57	1278
ENSG00000010295	IFFO1	34.93	0	11.19	0	26.4
ENSG00000010318	PHF7	2.69	0.55	3.42	3.61	3.22
ENSG00000010319	SEMA3G	3	2	1	0	1
ENSG00000010322	NISCH	1330.73	628.9	666.49	552.01	621.68
ENSG00000010327	STAB1	2	2	0	0	1
ENSG00000010361	FUZ	39.36	71.18	69.9	83.64	60.75
ENSG00000010404	IDS	379.85	473.05	693.09	588.44	458.3
ENSG00000010539	ZNF200	6.06	7.29	10	5.43	3.18
ENSG00000010610	CD4	46	6	67	31	0
ENSG00000010626	LRRC23	0	5.9	13.75	6.75	0
ENSG00000010704	HFE	130.68	134.23	95.54	97.3	0
ENSG00000010810	FYN	438.28	198.84	496.56	364.7	307.27
ENSG00000010818	HIVEP2	210.67	180.67	195.67	213.67	150
ENSG00000010932	FMO1	10.1	1	2	5	0
ENSG00000011007	ELOA	217.05	462.43	352.33	325.47	243.84
ENSG00000011009	LYPLA2	102.63	227.01	168	147.32	102.89
ENSG00000011021	CLCN6	251.1	118.49	257	248	198.95
ENSG00000011028	MRC2	42237.23	10204.19	15139.05	16372	17203.38
ENSG00000011052	NME1-NME2	561.08	1322.47	1109.03	1115.39	879.4
ENSG00000011105	TSPAN9	223.89	93.95	163.61	51.18	28.3
ENSG00000011114	BTBD7	332.79	246.09	198.13	317.28	283.78
ENSG00000011132	APBA3	192	189	192	182	165
ENSG00000011143	MKS1	20.16	50.69	11.9	29.06	35.54
ENSG00000011198	ABHD5	115.22	207.2	132.32	90.13	97.97
ENSG00000011201	ANOS1	7	4	18	5	7
ENSG00000011258	MBTD1	51	13.05	37	21.78	26.48
ENSG00000011260	UTP18	271.8	647	477	462	390
ENSG00000011275	RNF216	432.68	429	471.76	488.04	451.74
ENSG00000011295	TTC19	85.14	153.04	157.14	203.58	128.21
ENSG00000011304	PTBP1	0	47.76	0	7.77	48.93
ENSG00000011347	SYT7	16	4.37	0	6.61	11.71
ENSG00000011376	LARS2	79.33	128.69	103.55	88	68.33
ENSG00000011405	PIK3C2A	564	278.77	709	639.02	503.95
ENSG00000011422	PLAUR	38.62	312.33	74.47	150.11	68.58
ENSG00000011426	ANLN	21.59	1375.35	99.47	576.57	353.84
ENSG00000011451	WIZ	46.29	0	52.04	18.34	8.63
ENSG00000011454	RABGAP1	946	537.42	808	749	692
ENSG00000011465	DCN	5729.7	1399.98	2035.95	2916.38	4588.88
ENSG00000011478	QPCTL	137	232	211.85	126.04	87.83
ENSG00000011485	PPP5C	45.89	196.15	0	169.47	0
ENSG00000011523	CEP68	215	209	153.42	205	212.08
ENSG00000011566	MAP4K3	176.36	117.37	171.13	114.52	101.46
ENSG00000011590	ZBTB32	1	0	2	0	4
ENSG00000011638	TMEM159	16.84	13.24	23.04	22.44	23.37
ENSG00000012061	ERCC1	11.42	4.83	0	0	15.54
ENSG00000012171	SEMA3B	99.69	76.36	73.34	66.63	139.51
ENSG00000012174	MBTPS2	148.36	275.2	265.45	301.96	239
ENSG00000012211	PRICKLE3	92.55	115.06	130.78	88.2	83.62
ENSG00000012817	KDM5D	538.4	540.06	507.73	509.91	0
ENSG00000012822	CALCOCO1	1117.97	413.31	618.37	628.77	981.91
ENSG00000012963	UBR7	172.1	580.84	145	296.84	237.72
ENSG00000012983	MAP4K5	870	852	844.1	1012.42	984
ENSG00000013016	EHD3	1512	594	871	519	340
ENSG00000013275	PSMC4	718	1395.51	1039	922.49	674
ENSG00000013288	MAN2B2	2257.71	1426.29	1511.09	1521.68	1669
ENSG00000013293	SLC7A14	376	10	91	37	185
ENSG00000013297	CLDN11	987	255	1937	793	863
ENSG00000013306	SLC25A39	149.06	339.13	250.92	251.48	206.4
ENSG00000013364	MVP	3014.88	3370.42	3187.57	2869.04	2401.98
ENSG00000013374	NUB1	519.91	371.01	442.85	477.26	489.02
ENSG00000013375	PGM3	154.1	0	3.16	458.02	44.01
ENSG00000013392	RWDD2A	66	48	60	76	79
ENSG00000013441	CLK1	157.8	13.33	64.37	86.31	74.21
ENSG00000013503	POLR3B	160.77	288.22	215.23	125.86	89.69
ENSG00000013523	ANGEL1	174.42	169.22	185.79	166	133.58
ENSG00000013561	RNF14	79.13	82.59	62.3	61.36	56.52
ENSG00000013563	DNASE1L1	63.67	37.72	14.43	7.91	21.7
ENSG00000013573	DDX11	9.92	147.57	0	126.58	0
ENSG00000013583	HEBP1	480.51	377.52	489.38	445.36	377.82
ENSG00000013588	GPRC5A	0	35	0	33	53.85
ENSG00000013619	MAMLD1	44.04	111.37	54.32	74.21	62.77
ENSG00000013810	TACC3	48.5	2023.48	119.23	592.08	399
ENSG00000014123	UFL1	374	293	431	409	405
ENSG00000014138	POLA2	42	698.26	85.63	224.28	187.74
ENSG00000014164	ZC3H3	387	490	284	324	333
ENSG00000014216	CAPN1	542.95	592.13	545.2	448.64	370.19
ENSG00000014641	MDH1	0	44.24	93.64	60.4	153.25
ENSG00000014824	SLC30A9	480	561	604	673	494
ENSG00000014914	MTMR11	222	118.85	70.81	133	167
ENSG00000014919	COX15	101.62	150.93	141.69	96.56	150.31
ENSG00000015133	CCDC88C	1	20	12.68	6	2.53
ENSG00000015153	YAF2	23.76	36.54	34.71	37.77	33.68
ENSG00000015171	ZMYND11	22.64	0	11.78	0	1.41
ENSG00000015475	BID	0.69	4.62	1.81	0.8	1.48
ENSG00000015532	XYLT2	69.99	0	0	0.45	19.84
ENSG00000015568	RGPD5	210.33	154.42	277.81	285.68	240.59
ENSG00000015676	NUDCD3	354	522	324	382	371
ENSG00000016391	CHDH	19.18	23	0	4.57	14
ENSG00000016402	IL20RA	5.5	0	3	3	0
ENSG00000016864	GLT8D1	171.83	125.42	132.66	124.55	129.34
ENSG00000017483	SLC38A5	0	405.9	171.8	189.31	65.66
ENSG00000017797	RALBP1	484.1	560	402	443.5	469.58
ENSG00000018189	RUFY3	171.23	50.09	113.01	122.09	151.82
ENSG00000018408	WWTR1	218.88	92.47	151.87	180.9	175.56
ENSG00000018510	AGPS	432	755.68	713.26	694.9	443.34
ENSG00000018610	STEEP1	86	125.68	101	105.5	95
ENSG00000018625	ATP1A2	0	1	0	12	5
ENSG00000018699	TTC27	212	420.34	295.72	340	303.82
ENSG00000018869	ZNF582	0.85	2.06	3.92	5.22	1.27
ENSG00000019144	PHLDB1	9.32	5.62	3.01	0	8.78
ENSG00000019549	SNAI2	511	353.44	636.62	317.91	239.34
ENSG00000019991	HGF	295.14	67.32	299.35	205.98	139.05
ENSG00000019995	ZRANB1	519	459	623	692	443
ENSG00000020129	NCDN	0	311.75	0	313.92	283.08
ENSG00000020181	ADGRA2	8053.54	2747.18	4648.15	4325.73	3322.47
ENSG00000020426	MNAT1	140.05	205.76	186.56	164.36	108.1
ENSG00000020577	SAMD4A	147.85	177.53	130.94	134.01	169.5
ENSG00000020633	RUNX3	0	25.22	47.95	24.13	17.56
ENSG00000020922	MRE11	115.94	100.6	78.59	222.63	200
ENSG00000021355	SERPINB1	446	463	345	389	296
ENSG00000021574	SPAST	52.01	14.99	31.69	43.08	43.53
ENSG00000021762	OSBPL5	926.29	852	654.55	613.69	472.6
ENSG00000021776	AQR	606	758	662	746	597
ENSG00000022277	RTF2	642.47	1121.86	839.27	842.3	718.86
ENSG00000022567	SLC45A4	81	53.02	33.12	62.92	63.19
ENSG00000022840	RNF10	1523.31	1682.68	1631.49	1583.8	1393.7
ENSG00000022976	ZNF839	0	7.9	23.69	21.93	0
ENSG00000023171	GRAMD1B	44.44	149.39	0	26.62	40.14
ENSG00000023191	RNH1	579.35	583.56	564.48	638.14	810.62
ENSG00000023287	RB1CC1	545.47	320.76	399.05	444.83	585.81
ENSG00000023318	ERP44	691	505	712	579	449
ENSG00000023330	ALAS1	90.96	153.97	234	191.75	113.5
ENSG00000023445	BIRC3	6	8.33	9.33	19.33	11
ENSG00000023516	AKAP11	878	575	712	916	890
ENSG00000023572	GLRX2	18.3	57.5	39.78	39.5	22.5
ENSG00000023608	SNAPC1	89	400	305	230	118
ENSG00000023697	DERA	195.24	424.07	258.53	297.07	227.97
ENSG00000023734	STRAP	635	1226.04	955	904.85	704
ENSG00000023839	ABCC2	16	30	13.79	15	12
ENSG00000023892	DEF6	2	4	7.49	0	1
ENSG00000023909	GCLM	191.23	236.68	294.01	264.54	310.8
ENSG00000024048	UBR2	270.41	73.22	278.4	169.45	138.73
ENSG00000024422	EHD2	4871.28	5109.11	5391.36	5150.09	4783.8
ENSG00000024526	DEPDC1	1.99	411.18	33.32	194.34	104.51
ENSG00000024862	CCDC28A	4.76	0	9.53	1.55	0
ENSG00000025039	RRAGD	0	2.19	5.87	5.76	6
ENSG00000025156	HSF2	83.38	98.82	102.5	111.31	42.6
ENSG00000025293	PHF20	594	593	517	654	624
ENSG00000025423	HSD17B6	1	5.2	2	2.6	2
ENSG00000025708	TYMP	88.81	51.42	268.61	78.68	66.76
ENSG00000025770	NCAPH2	186.7	1062.95	251.91	442.02	285.42
ENSG00000025772	TOMM34	183	440	212	338	242
ENSG00000025796	SEC63	1550	888	1691	1821	1544
ENSG00000025800	KPNA6	400	623	451	432.28	368
ENSG00000026025	VIM	83577.24	99100.63	73827.25	80336.14	66981.87
ENSG00000026103	FAS	147.95	164.11	185.69	185.36	158.95
ENSG00000026508	CD44	6756.12	5333.67	4314.68	4531.92	4463.35
ENSG00000026559	KCNG1	41.23	75.83	141.95	260.62	265.79
ENSG00000026652	AGPAT4	94.7	60	69	49	54.74
ENSG00000026950	BTN3A1	169.95	97.07	168.34	110.71	104.93
ENSG00000027001	MIPEP	199	438	259	328	231
ENSG00000027075	PRKCH	5	0.27	0	0	0.68
ENSG00000027644	INSRR	1	1	0	0	2
ENSG00000027697	IFNGR1	583.18	406	829.04	523.21	468
ENSG00000027847	B4GALT7	167	269.58	283.36	172	196
ENSG00000027869	SH2D2A	3	9	8	1	0
ENSG00000028116	VRK2	71.1	16.03	13.03	45.33	0
ENSG00000028137	TNFRSF1B	70	168	119	141	96
ENSG00000028203	VEZT	284.39	261.22	418.09	407.01	405.61
ENSG00000028277	POU2F2	12.73	35.2	37.79	14.91	0
ENSG00000028310	BRD9	275.21	575.56	293.43	367.69	299.45
ENSG00000028528	SNX1	0	0	7.31	1.74	4.96
ENSG00000028839	TBPL1	24	31.54	21.5	21	28.01
ENSG00000029153	ARNTL2	0	24.24	6.3	22.67	0
ENSG00000029363	BCLAF1	815.43	657.66	715.77	1053.22	989.11
ENSG00000029364	SLC39A9	64.99	89.37	72.26	41.52	24.57
ENSG00000029534	ANK1	11.68	14.91	0	0	11.12
ENSG00000029639	TFB1M	25	119	85	98	76
ENSG00000029725	RABEP1	598.6	519.98	551.73	776.35	715.73
ENSG00000029993	HMGB3	0	15.25	22.75	7.04	0
ENSG00000030066	NUP160	622	901.74	553.66	545.07	492.65
ENSG00000030110	BAK1	34	88	68	52	46
ENSG00000030582	GRN	8767.21	3593.32	5599.94	4442.71	4599.56
ENSG00000031003	FAM13B	499.38	258.49	375.93	483.31	497.53
ENSG00000031081	ARHGAP31	255	539	490	357.88	296.96
ENSG00000031691	CENPQ	9	88	24	91	57
ENSG00000031698	SARS1	2015.31	1857.9	3581.9	3793.98	3536.28
ENSG00000031823	RANBP3	0	90.75	97.06	103.24	110
ENSG00000032219	ARID4A	253.04	111	196.8	197.93	189.96
ENSG00000032389	EIPR1	0	6.47	2.8	11.56	0
ENSG00000032444	PNPLA6	366.41	118.31	371.69	0	136.91
ENSG00000032742	IFT88	0	83.04	149.81	127.19	131.07
ENSG00000033011	ALG1	331.55	516	441.69	516	379
ENSG00000033030	ZCCHC8	132.33	202.14	167.75	165.7	186.56
ENSG00000033050	ABCF2	49.85	1188.62	627.61	561.13	391.9
ENSG00000033100	CHPF2	2482	1730.2	2142	1356	1363
ENSG00000033122	LRRC7	1	0	0	2	3
ENSG00000033170	FUT8	388	250.5	216.19	202.21	191.15
ENSG00000033178	UBA6	484	462.1	619	656	516.11
ENSG00000033327	GAB2	45.78	73	30.39	136.98	94.74
ENSG00000033627	ATP6V0A1	46.78	103.62	82.74	52.89	98.93
ENSG00000033800	PIAS1	270.44	269.79	231.68	264.92	249.73
ENSG00000034152	MAP2K3	232.75	854.49	369.75	578.91	594.93
ENSG00000034533	ASTE1	29.87	57	45.91	54	41.33
ENSG00000034677	RNF19A	166.4	183.65	195	221.5	179
ENSG00000034693	PEX3	81	131	111	111	96
ENSG00000034713	GABARAPL2	88	116	79.19	101	95
ENSG00000035141	FAM136A	81	212.17	103.87	94.88	95.81
ENSG00000035403	VCL	6228.25	8059.12	7977.02	7199.91	7962.16
ENSG00000035499	DEPDC1B	4	184	5	63.52	26
ENSG00000035664	DAPK2	30.92	10	1.5	11.77	31.78
ENSG00000035681	NSMAF	671.04	751.11	903.14	1243.03	1137.32
ENSG00000035687	ADSS2	372	886	641	920	701
ENSG00000035862	TIMP2	4978.97	2905.15	2638.84	3381.77	3390.02
ENSG00000035928	RFC1	163.92	189.13	153.14	309.85	180.1
ENSG00000036054	TBC1D23	36.74	81.28	82.53	33.3	22.55
ENSG00000036257	CUL3	95.4	84.57	176.8	82.49	97.82
ENSG00000036530	CYP46A1	1	3	1	0	3
ENSG00000036549	ZZZ3	447	296.36	513.04	585.29	423.16
ENSG00000037042	TUBG2	185.67	135.24	135.28	79.35	166.61
ENSG00000037241	RPL26L1	20.63	55.88	41.15	46.26	33.25
ENSG00000037280	FLT4	1.16	0	0	1	6
ENSG00000037637	FBXO42	315.8	292	261.06	307	262.11
ENSG00000037757	MRI1	162.83	195.95	145.18	121.16	140.35
ENSG00000037897	METTL1	23	122.61	57	73.2	47.07
ENSG00000038002	AGA	237	369	280	202.54	219.18
ENSG00000038210	PI4K2B	199	264	242	222	189
ENSG00000038219	BOD1L1	1120.89	695.68	1059.25	1229.03	1171.18
ENSG00000038274	MAT2B	47.62	0	55.53	49.35	25.93
ENSG00000038358	EDC4	937	1526.87	905	925.94	783.31
ENSG00000038382	TRIO	5044.76	7953.89	7068.06	7477.82	5652.29
ENSG00000038427	VCAN	6527.38	2251	3653.43	2310.75	2884.31
ENSG00000038532	CLEC16A	175.1	186.69	116.02	119.05	104.75
ENSG00000039068	CDH1	0	6.62	86	3	0
ENSG00000039123	MTREX	710	702	833	866	671
ENSG00000039139	DNAH5	73	106	159	141	73
ENSG00000039319	ZFYVE16	171.33	119.33	166.67	223.67	187.33
ENSG00000039560	RAI14	25.24	6.51	59.94	138.84	76.8
ENSG00000039650	PNKP	135.62	233.69	166.5	140.16	126
ENSG00000040275	SPDL1	79.35	682.33	145.62	294.74	271.15
ENSG00000040341	STAU2	25.14	65.97	37.97	27.03	26.56
ENSG00000040487	SLC66A1	21.25	20.16	49.12	47.55	39.71
ENSG00000040531	CTNS	93.85	74	106.64	145	141
ENSG00000040633	PHF23	415.3	576.34	507.98	549.78	410.44
ENSG00000040933	INPP4A	48.98	110.54	92.8	80.08	83.25
ENSG00000041353	RAB27B	2	8	14.75	38.28	4
ENSG00000041357	PSMA4	52.62	329.72	330.18	297.36	239.86
ENSG00000041515	MYO16	3.88	0	1	0	3
ENSG00000041802	LSG1	233.62	502.46	321.63	341.56	334.82
ENSG00000041982	TNC	13.67	35.45	25.69	36.12	76.88
ENSG00000041988	THAP3	66.68	81.86	77.95	76.35	29.36
ENSG00000042062	RIPOR3	1066.61	0	213.92	0	204
ENSG00000042088	TDP1	37.82	212.43	44.81	90.8	44.83
ENSG00000042286	AIFM2	106.67	144	192.67	229.33	111.67
ENSG00000042317	SPATA7	17.04	0	8.65	23.27	18.83
ENSG00000042429	MED17	174.93	308.8	207.12	201.4	176.82
ENSG00000042445	RETSAT	940.5	702.42	815.74	889.69	674.89
ENSG00000042493	CAPG	121.89	248	114.32	78.83	152.99
ENSG00000042753	AP2S1	12.39	0	38.15	65.18	0
ENSG00000042832	TG	31.28	2.87	8.68	1.49	6
ENSG00000043093	DCUN1D1	127	121.54	131.85	110.97	133
ENSG00000043143	JADE2	33.46	36.86	6.68	19	21.67
ENSG00000043355	ZIC2	7	1	0	5	0
ENSG00000043514	TRIT1	90.51	129.95	87.95	87.56	96.25
ENSG00000044090	CUL7	1213.12	909.82	1136.15	895.54	893.26
ENSG00000044446	PHKA2	176	278	150	166	179
ENSG00000044459	CNTLN	162.7	116.57	141.29	172.43	168.79
ENSG00000044574	HSPA5	7494	6386	13659	11764	8796
ENSG00000046604	DSG2	0	52	174	135.9	2
ENSG00000046647	GEMIN8	64.5	46	44.01	35.16	54
ENSG00000046651	OFD1	41.24	54.25	19.22	86.21	0
ENSG00000047056	WDR37	42.65	57.04	30.11	40.5	34.5
ENSG00000047188	YTHDC2	431.64	343.23	520	526	388.37
ENSG00000047230	CTPS2	33.33	54	24.67	31.33	29
ENSG00000047249	ATP6V1H	9.69	31.16	22.18	30.95	9.24
ENSG00000047315	POLR2B	588.64	901.29	756.87	757.94	731.17
ENSG00000047365	ARAP2	1	0	5.7	0	1.92
ENSG00000047410	TPR	1888.48	1256	1775	2295	2140.54
ENSG00000047457	CP	857.95	0	27.54	0	3
ENSG00000047578	KATNIP	546.94	456.29	435.46	413.1	482.13
ENSG00000047579	DTNBP1	29.5	7.88	7.83	34.66	13.25
ENSG00000047621	C12orf4	48.22	78.79	58.5	62.62	52.5
ENSG00000047634	SCML1	17.45	32.93	36.49	33.42	29.17
ENSG00000047644	WWC3	608	583	547	584	498
ENSG00000047648	ARHGAP6	8.74	8.67	21.68	23.74	8.73
ENSG00000047849	MAP4	279.14	33.91	136.47	259.8	113.54
ENSG00000048052	HDAC9	37.8	0	17.17	2.06	23.6
ENSG00000048140	TSPAN17	2.49	13.62	0	5.71	2.8
ENSG00000048162	NOP16	8.56	28.08	10.96	18.41	4.55
ENSG00000048342	CC2D2A	220.95	118.47	196.64	237.28	109.05
ENSG00000048392	RRM2B	112.72	133.6	177.92	143.46	110.4
ENSG00000048405	ZNF800	49.89	41	55.15	67	42.35
ENSG00000048471	SNX29	1132.26	377	620	549	571.98
ENSG00000048544	MRPS10	117	246	177	232	172
ENSG00000048649	RSF1	535.61	250.49	472.88	417.69	410.93
ENSG00000048707	VPS13D	46.92	197.08	95.88	316	350.73
ENSG00000048828	FAM120A	2617.78	3251.03	2648.62	2724.8	2363.73
ENSG00000048991	R3HDM1	119.65	206.28	147.97	108.32	87.83
ENSG00000049089	COL9A2	17.61	6	6.37	0	3.3
ENSG00000049130	KITLG	9.52	8.46	17.22	18.05	7.24
ENSG00000049192	ADAMTS6	16.22	172.84	176	218.94	122.38
ENSG00000049239	H6PD	403.52	297.72	529.82	421.97	253.97
ENSG00000049245	VAMP3	36.54	73	49	51.27	37
ENSG00000049246	PER3	102.3	65.34	41.62	63.66	56.13
ENSG00000049323	LTBP1	2190.48	258.7	742.07	500.2	565.31
ENSG00000049449	RCN1	3245	2270	5494	3935	2879
ENSG00000049541	RFC2	4.18	0	6.62	3.55	0
ENSG00000049618	ARID1B	233.53	85.71	278.6	202.03	217.65
ENSG00000049656	CLPTM1L	915.6	1747	1216	1120	934
ENSG00000049860	HEXB	3313.66	2882	2875.71	2938	2098.52
ENSG00000049883	PTCD2	18.73	20.03	23.19	26.33	20.74
ENSG00000050165	DKK3	1771.76	2495.12	2504.84	1930.74	2113.44
ENSG00000050327	ARHGEF5	451.48	184.33	352.09	244.66	205.32
ENSG00000050344	NFE2L3	82	150	393	98	54
ENSG00000050393	MCUR1	165.14	359	272	278.52	288
ENSG00000050405	LIMA1	2757.91	2189.87	2302.38	2603.56	1957.89
ENSG00000050426	LETMD1	9.99	15.08	3.29	0	9.78
ENSG00000050438	SLC4A8	122.6	188.97	94	104.28	90.79
ENSG00000050555	LAMC3	1	1	6	1	3
ENSG00000050748	MAPK9	190.98	225.06	178.49	256.84	213.07
ENSG00000050767	COL23A1	0	3	4	5	0
ENSG00000050820	BCAR1	0	187.88	77.35	45.09	75.79
ENSG00000051009	FAM160A2	31.13	157.4	35.66	91.57	49.77
ENSG00000051108	HERPUD1	1060.84	441.35	1123.96	1070.33	1096.18
ENSG00000051128	HOMER3	397.81	321.4	213.62	274.34	237.99
ENSG00000051180	RAD51	4.29	106.83	7.14	62.8	37.5
ENSG00000051341	POLQ	6	162.45	19.46	104.27	70.57
ENSG00000051382	PIK3CB	133.03	155.82	94.09	152.59	150.07
ENSG00000051523	CYBA	1171.9	678	841	741	620.69
ENSG00000051620	HEBP2	329.45	243.58	388.55	393.17	377.41
ENSG00000051825	MPHOSPH9	58.38	210.48	87.5	136.66	141.85
ENSG00000052126	PLEKHA5	1183.49	373.98	663.67	539.22	377.85
ENSG00000052723	SIKE1	64.77	57.98	60.77	73.07	59.09
ENSG00000052749	RRP12	144.02	301.18	207	249.5	192.24
ENSG00000052795	FNIP2	154	227.85	133.43	192.39	204.89
ENSG00000052802	MSMO1	111.42	136.17	195.86	240.11	23.28
ENSG00000052841	TTC17	648.51	321.99	578.76	770.24	651.41
ENSG00000052850	ALX4	3	13	1	0	6
ENSG00000053254	FOXN3	63.14	14.11	19.08	25.66	52.79
ENSG00000053328	METTL24	18	0	0	5	2
ENSG00000053371	AKR7A2	752	724	730.39	715	688.69
ENSG00000053372	MRTO4	104	629	187	337	242
ENSG00000053501	USE1	124.31	141.37	155.31	139.01	85.45
ENSG00000053747	LAMA3	788.31	345.84	356.77	906.23	1343.11
ENSG00000053770	AP5M1	184	131.85	206.84	197	153.48
ENSG00000053900	ANAPC4	208.41	204.94	168.67	216.93	165.97
ENSG00000054116	TRAPPC3	5.8	3.66	6.42	10.96	13.86
ENSG00000054118	THRAP3	678.5	1211.5	754	958	758
ENSG00000054148	PHPT1	7.82	2.07	12.65	13.27	3.69
ENSG00000054219	LY75	269.89	0	79	34	39
ENSG00000054267	ARID4B	130.38	46.63	113.25	43.69	41.75
ENSG00000054277	OPN3	97.56	120.55	85.46	84.87	97.08
ENSG00000054282	SDCCAG8	159.38	113.21	160.1	111.73	131.62
ENSG00000054356	PTPRN	4.4	126.68	33.26	0	8.54
ENSG00000054392	HHAT	10.06	5.99	8.22	5.4	6.44
ENSG00000054523	KIF1B	152.06	158.4	82.12	74.99	165.2
ENSG00000054598	FOXC1	113	55	136	109	106
ENSG00000054611	TBC1D22A	258.69	360.65	283.51	301.99	221.95
ENSG00000054654	SYNE2	66.5	81.83	70.94	345.8	184.02
ENSG00000054690	PLEKHH1	1	9	12	3	2.17
ENSG00000054793	ATP9A	1328	402.28	554	762	1074.85
ENSG00000054965	FAM168A	2.86	9.96	2.65	12.48	0
ENSG00000054967	RELT	6	37.21	13	24.93	12.5
ENSG00000054983	GALC	0	12.99	20.88	35.84	0
ENSG00000055044	NOP58	206	558	365.78	497	326
ENSG00000055070	SZRD1	148.4	196.9	119.53	118.79	104.16
ENSG00000055130	CUL1	132.33	151.85	127.08	148.53	90.91
ENSG00000055147	FAM114A2	62.04	61.1	66.52	69.95	54.13
ENSG00000055163	CYFIP2	0	74	91.6	77.03	22.37
ENSG00000055208	TAB2	0	20.92	0	9.03	3.35
ENSG00000055332	EIF2AK2	137.32	140.89	275.12	132.82	123.74
ENSG00000055483	USP36	133.4	199.23	134.6	171.23	153.12
ENSG00000055609	KMT2C	580.63	215.69	321.95	300.48	379.2
ENSG00000055732	MCOLN3	20.11	2.04	11.91	2.04	0
ENSG00000055813	CCDC85A	175	103	3	0	4
ENSG00000055917	PUM2	0	17.69	6.13	147.67	0
ENSG00000055955	ITIH4	8	8	7	4.46	16
ENSG00000056050	HPF1	219	288	199	236	188
ENSG00000056097	ZFR	1314.96	1318.65	1410.6	1710.55	1405.9
ENSG00000056277	ZNF280C	50	43	52	49	42
ENSG00000056291	NPFFR2	0	1	2	1	0
ENSG00000056558	TRAF1	11.74	13.2	6.65	2.72	7.6
ENSG00000056586	RC3H2	225.86	143.71	169.75	194.03	196.66
ENSG00000056736	IL17RB	18	19	9	10	18
ENSG00000056998	GYG2	0	0	13.09	39.57	12.98
ENSG00000057019	DCBLD2	676.11	996	657	656	645
ENSG00000057252	SOAT1	338	536.02	402	599	393.93
ENSG00000057294	PKP2	1	1	6	0	0
ENSG00000057593	F7	5	3	0	1	0
ENSG00000057608	GDI2	1971.51	3051.5	2227.73	2208.95	1921.74
ENSG00000057657	PRDM1	0	1.97	5.11	9.39	0.65
ENSG00000057663	ATG5	5.29	0	0	5.19	19.48
ENSG00000057757	PITHD1	73.99	160.09	113.7	114.86	116.89
ENSG00000058056	USP13	83.07	225.92	82.78	301.37	118.72
ENSG00000058063	ATP11B	666.47	427	560.91	787.6	714
ENSG00000058085	LAMC2	41.06	226	1125.93	56	25
ENSG00000058091	CDK14	303.74	130.57	293.51	240.99	244
ENSG00000058262	SEC61A1	1846.24	3078.41	2021.81	1632.47	1313.59
ENSG00000058272	PPP1R12A	314.55	401.7	341.3	349.36	354.42
ENSG00000058453	CROCC	704.56	310.38	361.08	438.85	468.46
ENSG00000058600	POLR3E	56.61	0	44.11	2.62	117.97
ENSG00000058729	RIOK2	267	270	353	287	258
ENSG00000058799	YIPF1	65	73.5	68.1	75.42	61.5
ENSG00000058804	NDC1	61	668	142	361	214
ENSG00000059122	FLYWCH1	478.88	375.54	447.94	620.72	436.38
ENSG00000059145	UNKL	293.49	118.9	187.6	156.56	263.47
ENSG00000059378	PARP12	141.65	118	452.32	173.75	183
ENSG00000059573	ALDH18A1	1093.47	1305.32	1253.15	995.45	942.97
ENSG00000059588	TARBP1	251	442	323	359	337
ENSG00000059691	GATB	158.6	321.46	258.89	246.52	158.12
ENSG00000059728	MXD1	0	0	3.95	2.75	6.97
ENSG00000059758	CDK17	134.32	132.08	93.24	221.51	67.14
ENSG00000059769	DNAJC25	93.24	129.26	118.53	145.54	91.57
ENSG00000059804	SLC2A3	219	402	430	823	438
ENSG00000060069	CTDP1	294.57	243.68	212.4	229.85	185.59
ENSG00000060138	YBX3	665.77	1176.52	1016.41	1172.98	940.36
ENSG00000060140	STYK1	1	20.21	13	5	2
ENSG00000060237	WNK1	897.4	1266.88	882.86	1155.39	1052.61
ENSG00000060339	CCAR1	5.63	0	0	5.96	3.02
ENSG00000060491	OGFR	1115.7	1112	961	934	792.71
ENSG00000060642	PIGV	12.25	4.45	0	0	2.48
ENSG00000060656	PTPRU	527.08	240.63	392.51	273.44	196.35
ENSG00000060688	SNRNP40	233	547	291	360	302.05
ENSG00000060718	COL11A1	357.53	1181.44	5338.04	3166.01	306
ENSG00000060749	QSER1	275.01	536.37	316.03	412.21	439.19
ENSG00000060762	MPC1	0	0	0.71	0.9	0.83
ENSG00000061273	HDAC7	532.36	386	640.26	412.59	29.26
ENSG00000061337	LZTS1	3.5	54.5	12.5	10	0
ENSG00000061455	PRDM6	33	10	7	7	3
ENSG00000061656	SPAG4	7.85	5	6.12	3.18	4
ENSG00000061676	NCKAP1	2714	2307	3162	3407	3029
ENSG00000061794	MRPS35	222.93	420.89	369.91	326.01	290
ENSG00000061918	GUCY1B1	318.98	80	79.75	43	38.2
ENSG00000061936	SFSWAP	525.44	655.54	543.8	595.42	558.63
ENSG00000061938	TNK2	392.36	115.23	182.51	68.7	147.12
ENSG00000061987	MON2	1033.99	573.81	735.51	681.37	829.91
ENSG00000062194	GPBP1	42.82	100.71	108.6	81.9	65.27
ENSG00000062485	CS	146.66	57.88	106.76	229.78	57.6
ENSG00000062524	LTK	3.04	5.9	0	7.8	9
ENSG00000062582	MRPS24	527.7	702.84	955.45	635.11	481.99
ENSG00000062598	ELMO2	219.71	237.34	227.56	247.57	176.51
ENSG00000062650	WAPL	294.5	429	342.25	425.5	319
ENSG00000062716	VMP1	392.84	585.36	566.05	513.78	325.54
ENSG00000062725	APPBP2	356.64	284.25	414.99	333.9	299
ENSG00000063046	EIF4B	7070.35	3339	4674.61	4798.29	4203.39
ENSG00000063127	SLC6A16	8	0	2	2.25	1
ENSG00000063169	BICRA	228.07	112.94	0	94.9	119.53
ENSG00000063177	RPL18	2331.45	1940.68	3176.84	2581.44	2435.95
ENSG00000063180	CA11	50	0	12	5	2
ENSG00000063241	ISOC2	19.56	33.48	21.21	8.51	5.13
ENSG00000063244	U2AF2	1003.87	2583.24	1478.88	1519.95	1185.41
ENSG00000063245	EPN1	1599.29	2053.08	1513.54	1526.39	1373.63
ENSG00000063438	AHRR	30.47	19.43	0	18.19	19.27
ENSG00000063587	ZNF275	75.52	96	105.43	86.44	117
ENSG00000063660	GPC1	1102.21	2456.93	1585.35	2301.38	2086.41
ENSG00000063761	ADCK1	50	70	57.55	69	53.44
ENSG00000064012	CASP8	13.97	0	8.29	18.1	9
ENSG00000064102	INTS13	139.31	277.29	245.91	230	186.24
ENSG00000064115	TM7SF3	292.56	668.05	550.15	453.85	300.38
ENSG00000064199	SPA17	6	31	13.5	18	8.5
ENSG00000064205	CCN5	4431.8	127.69	42.03	64.65	211.66
ENSG00000064309	CDON	28.34	3.01	0	16	0
ENSG00000064313	TAF2	477.67	607.21	487.3	534.55	413.52
ENSG00000064393	HIPK2	271.22	358.89	141.92	319.8	242.42
ENSG00000064489	BORCS8-MEF2B	3.06	7.37	8.15	7.33	6.98
ENSG00000064490	RFXANK	4.01	0.68	14.81	21.77	0
ENSG00000064545	TMEM161A	207.73	204.78	256.51	210.64	178.77
ENSG00000064547	LPAR2	4.67	3	3	0.67	2.33
ENSG00000064601	CTSA	10.84	8.24	6.79	26.49	7.9
ENSG00000064607	SUGP2	37.69	74.58	19.65	17.88	24.19
ENSG00000064651	SLC12A2	291.41	146.8	150.16	237.02	199.12
ENSG00000064652	SNX24	41.29	29.74	37.79	37.16	17.68
ENSG00000064655	EYA2	49	276.58	184.7	168	28.39
ENSG00000064666	CNN2	178.39	64.48	46.65	90	38.93
ENSG00000064687	ABCA7	79.01	25.7	74.03	0	21.67
ENSG00000064692	SNCAIP	109.29	121.6	141.03	107.04	27.9
ENSG00000064703	DDX20	21.99	61.38	25	23.91	19.72
ENSG00000064726	BTBD1	667.76	683.82	728.59	790.92	700
ENSG00000064763	FAR2	21.85	48.5	37.19	65.35	36.64
ENSG00000064932	SBNO2	1272.86	661.85	989.09	664.13	754.68
ENSG00000064933	PMS1	17.14	29.1	19.63	38.13	39.72
ENSG00000064961	HMG20B	588.5	1031.99	467.8	604.6	368.58
ENSG00000064989	CALCRL	1.67	0	4	1	2.33
ENSG00000064995	TAF11	40	107.33	82	80	80
ENSG00000064999	ANKS1A	272.37	240.76	219.52	170.41	121.69
ENSG00000065000	AP3D1	1343.72	1939.9	1314.24	1774.19	1240.67
ENSG00000065054	SLC9A3R2	210.89	53.66	166.63	73.88	61.36
ENSG00000065057	NTHL1	54.26	27.75	27.44	110.55	27.03
ENSG00000065135	GNAI3	575	852	722	823	647
ENSG00000065150	IPO5	508.31	1057.03	661.83	835.34	891
ENSG00000065154	OAT	255.93	98.92	247.44	164.83	133.99
ENSG00000065183	WDR3	254	704	475	549	327
ENSG00000065243	PKN2	374.35	397.03	393.4	477.92	431.81
ENSG00000065268	WDR18	5.25	5.92	6.74	0	10.85
ENSG00000065308	TRAM2	769	1156	1029	888	745
ENSG00000065320	NTN1	335.92	31	755	799	218
ENSG00000065328	MCM10	5.99	313.41	12.85	149.24	78.58
ENSG00000065357	DGKA	131.34	147.59	160.71	117.8	147.15
ENSG00000065361	ERBB3	3.23	3.12	11.59	0	3.49
ENSG00000065413	ANKRD44	94.42	15.85	0	36.88	51.75
ENSG00000065427	KARS1	96.36	59.69	24.55	51.58	0
ENSG00000065485	PDIA5	1196.62	397.62	690.93	365	467.21
ENSG00000065491	TBC1D22B	83	99	80	80	61
ENSG00000065518	NDUFB4	391	584	470	370	298
ENSG00000065526	SPEN	1582.42	1179.44	944.5	1309.38	1369.39
ENSG00000065534	MYLK	2313.12	2169.55	4578.74	2533.86	1112.21
ENSG00000065548	ZC3H15	342	455	553	542	405
ENSG00000065600	PACC1	48	54	100	71	57
ENSG00000065615	CYB5R4	157.59	148.03	240	193	124.66
ENSG00000065618	COL17A1	16	61	395.17	2	7
ENSG00000065621	GSTO2	0	7.11	6	2	0
ENSG00000065802	ASB1	181.13	408.75	261.81	330.32	253.02
ENSG00000065809	FAM107B	53.29	46.03	11.67	44.29	28.29
ENSG00000065833	ME1	564	432	1298	802	493
ENSG00000065882	TBC1D1	72.83	188.53	87.98	86.81	116.97
ENSG00000065883	CDK13	183.85	271.8	170.7	222.42	290.78
ENSG00000065911	MTHFD2	543	584	1779	1730.5	1495
ENSG00000065923	SLC9A7	370.55	587	362	489	391
ENSG00000065970	FOXJ2	248	298	187	249	252
ENSG00000065978	YBX1	3840.13	10879.11	6814.65	7726.27	5655.98
ENSG00000066027	PPP2R5A	330	207.75	209.07	233	184
ENSG00000066044	ELAVL1	237.5	569	280	328.5	289
ENSG00000066084	DIP2B	540	413	480	564	500
ENSG00000066117	SMARCD1	19.07	8.11	46.41	20.6	18.47
ENSG00000066135	KDM4A	871.11	710	866.26	691	737.28
ENSG00000066136	NFYC	27.36	51.68	48.94	41.22	31.82
ENSG00000066185	ZMYND12	0	1	3	0	1
ENSG00000066230	SLC9A3	6	0	1	1	4.81
ENSG00000066279	ASPM	78	1757	134.47	1321.49	956.19
ENSG00000066379	POLR1H	3	4.75	7	3.75	2.5
ENSG00000066382	MPPED2	0	4	1	1	0
ENSG00000066422	ZBTB11	328.89	199.75	245	245.25	276.51
ENSG00000066455	GOLGA5	903.84	712	966.86	907	741
ENSG00000066557	LRRC40	167	195	210	258	163
ENSG00000066583	ISOC1	109.86	152	167	92	64
ENSG00000066654	THUMPD1	32.71	28.57	44.35	39.06	40.09
ENSG00000066697	MSANTD3	74.76	159.57	106.89	137.73	102.01
ENSG00000066739	ATG2B	662	418	559	557	611
ENSG00000066777	ARFGEF1	1186.82	728.75	971.47	1016.96	884.53
ENSG00000066855	MTFR1	108.87	141.7	108.57	154.06	119.64
ENSG00000066926	FECH	166.93	237.78	211.73	214.18	253.77
ENSG00000066933	MYO9A	153.11	116.29	86.38	1.33	186.23
ENSG00000067048	DDX3Y	215.97	183.76	191.01	224.83	0
ENSG00000067057	PFKP	731.97	2871.72	1324.1	1439.15	957.46
ENSG00000067064	IDI1	51.65	50.66	27.32	43.84	55.57
ENSG00000067066	SP100	172.03	52.14	241.11	120.12	88.66
ENSG00000067082	KLF6	308.26	936.48	520.65	561.57	437.24
ENSG00000067113	PLPP1	34.7	3.92	14.79	7.88	10.48
ENSG00000067141	NEO1	2.69	0	26.89	23.42	41.63
ENSG00000067167	TRAM1	3661	2867	4272	4434	2890
ENSG00000067182	TNFRSF1A	2717.92	2056.18	1944.32	1890.37	1982.04
ENSG00000067191	CACNB1	10.99	2.17	3.24	0	0
ENSG00000067208	EVI5	0	16.5	43.48	10.56	22.29
ENSG00000067221	STOML1	83.42	197.54	154.92	84.83	128.79
ENSG00000067225	PKM	322.2	314.75	349.42	424.94	327.05
ENSG00000067248	DHX29	762	810	835	864.57	768.62
ENSG00000067334	DNTTIP2	368	479	497	624	445
ENSG00000067365	METTL22	100	183.83	144.72	145.65	114.81
ENSG00000067369	TP53BP1	1621.68	4.09	1834.45	825.05	0
ENSG00000067533	RRP15	84	193	172	188	157
ENSG00000067560	RHOA	1879.35	2997.1	2004.43	2197.56	2157.15
ENSG00000067596	DHX8	379.55	490.28	380	363.45	313.65
ENSG00000067646	ZFY	72.67	44.12	63.03	58.92	0
ENSG00000067704	IARS2	1522	2046	1825	2017	1768
ENSG00000067798	NAV3	4.7	9.83	11.32	0	23.7
ENSG00000067829	IDH3G	0	29.99	12.28	25.9	0
ENSG00000067836	ROGDI	81.35	82.58	75.63	77.42	86.65
ENSG00000067840	PDZD4	0	8	3.44	9.23	5.99
ENSG00000067900	ROCK1	1283	1125	1188	1573	1391
ENSG00000067955	CBFB	33.61	124.31	42.77	72.99	62.61
ENSG00000068001	HYAL2	80	127.71	97.86	94.29	65.99
ENSG00000068024	HDAC4	146.31	56.11	173.96	75.94	133.46
ENSG00000068079	IFI35	133.8	97.42	354.84	134.6	63.63
ENSG00000068097	HEATR6	279.41	388.38	399.7	384.98	338.37
ENSG00000068120	COASY	159.82	228.11	143.47	149.23	119.16
ENSG00000068137	PLEKHH3	150.91	49.43	138.62	88.95	175.68
ENSG00000068305	MEF2A	92.2	55.64	41.44	73.2	95.58
ENSG00000068308	OTUD5	297.79	278.04	290.47	195.65	237.2
ENSG00000068323	TFE3	23.15	8.31	13.15	16.61	7.18
ENSG00000068354	TBC1D25	212	257	197	203	174
ENSG00000068366	ACSL4	592.9	658.72	1123.33	625.12	396.5
ENSG00000068383	INPP5A	280	239.7	167	160.84	190.32
ENSG00000068394	GPKOW	280	493	357	475	305
ENSG00000068400	GRIPAP1	458.33	465	558.42	514	401
ENSG00000068438	FTSJ1	178.42	448.62	208.33	294.22	202.45
ENSG00000068489	PRR11	3.38	188.26	11.24	70.89	36.54
ENSG00000068650	ATP11A	77.28	108.35	162	0	84.31
ENSG00000068654	POLR1A	583	1195.8	777.29	938	781.5
ENSG00000068697	LAPTM4A	3287	2034	3019	2875	2375
ENSG00000068745	IP6K2	304.69	276.65	260.85	203.55	193.45
ENSG00000068784	SRBD1	114	200	130	277	199
ENSG00000068831	RASGRP2	8.64	0.33	0.74	0	0.33
ENSG00000068878	PSME4	1044	1788	1355	1403	1132
ENSG00000068885	IFT80	830.6	141.42	449.14	350.72	521.83
ENSG00000068903	SIRT2	229.28	75.28	81.64	88.91	88.09
ENSG00000068912	ERLEC1	777.76	733.33	964.02	790.13	738.58
ENSG00000068971	PPP2R5B	199.51	222.97	207.24	159	162
ENSG00000068976	PYGM	0	1	3	1	0
ENSG00000069011	PITX1	267	2.5	135.5	129.5	114.5
ENSG00000069020	MAST4	0	0	2.61	0.46	2.15
ENSG00000069188	SDK2	2	0	12.36	3	0
ENSG00000069248	NUP133	573	908	686	740	596
ENSG00000069275	NUCKS1	629	1413	797	1056	870
ENSG00000069329	VPS35	1160	1868	1555	1904	1501
ENSG00000069345	DNAJA2	575.11	707.33	683.64	641.92	534.85
ENSG00000069399	BCL3	229.52	431.17	327.83	360.05	371.42
ENSG00000069431	ABCC9	80	34	1.9	7	392
ENSG00000069482	GAL	1	6	0	0	2
ENSG00000069509	FUNDC1	34	60	44	57	49
ENSG00000069535	MAOB	4	3	0	1	1
ENSG00000069667	RORA	39.69	7.82	0	0	15.76
ENSG00000069702	TGFBR3	102.97	9.97	36.23	64.96	59.15
ENSG00000069849	ATP1B3	951.31	1097	857	671.02	437
ENSG00000069869	NEDD4	343.88	381.04	580.74	526.46	482.92
ENSG00000069943	PIGB	171	200	180.38	193	124
ENSG00000069956	MAPK6	346	590	836	896	543
ENSG00000069966	GNB5	57.57	79.64	86.02	64.66	43.29
ENSG00000069974	RAB27A	7.88	21.84	22.29	21.5	11.86
ENSG00000070010	UFD1	297.04	544.97	416.22	512.74	340.59
ENSG00000070018	LRP6	394.2	315.84	315.66	276.34	383.16
ENSG00000070047	PHRF1	692.96	1305.81	853.45	922.51	703.63
ENSG00000070061	ELP1	497.57	921.29	586.43	649.81	575.29
ENSG00000070081	NUCB2	217.26	131.94	181.52	105.21	180.72
ENSG00000070159	PTPN3	56.38	89.98	67.16	74.35	78.35
ENSG00000070182	SPTB	1	0	0	2	1
ENSG00000070193	FGF10	0	1	19	4	0
ENSG00000070366	SMG6	667.44	736.47	512.94	510.61	471.73
ENSG00000070367	EXOC5	492.48	497.16	584.16	713.17	614
ENSG00000070371	CLTCL1	59.29	85.88	35.58	35.94	85.91
ENSG00000070404	FSTL3	80	420	118	156	147
ENSG00000070413	DGCR2	50.65	104.38	27.71	0	0
ENSG00000070423	RNF126	200.06	573.22	276.95	275.84	212.41
ENSG00000070444	MNT	184	131	132	199	197
ENSG00000070476	ZXDC	70.82	259.07	97.83	156.4	160.49
ENSG00000070495	JMJD6	2	0	4.38	1.86	9.21
ENSG00000070501	POLB	37.97	74.15	76.39	48.92	35.12
ENSG00000070540	WIPI1	933.82	461.56	1342.15	1114.7	567.53
ENSG00000070610	GBA2	368.09	362.82	461.55	322.46	321.96
ENSG00000070614	NDST1	21.92	29.7	0	26.32	65.22
ENSG00000070669	ASNS	110.19	0	786.53	676.04	648.73
ENSG00000070718	AP3M2	17	26.88	14.85	48.45	27.97
ENSG00000070729	CNGB1	1	1	6	0	0
ENSG00000070731	ST6GALNAC2	0	6.55	5	5	6
ENSG00000070756	PABPC1	7.68	9.8	10.76	10.81	10.01
ENSG00000070759	TESK2	75	24	38	14	18
ENSG00000070761	CFAP20	46	172	98	97	71
ENSG00000070770	CSNK2A2	200	229.52	210.8	219	204.32
ENSG00000070778	PTPN21	444.73	343	286.74	335.61	334.5
ENSG00000070785	EIF2B3	35.97	0	23.91	7.43	0
ENSG00000070814	TCOF1	21.39	127.51	32.12	122.84	27.53
ENSG00000070831	CDC42	121.03	241.11	157.51	166.44	154.01
ENSG00000070882	OSBPL3	450.39	483.77	299.23	360.17	461.87
ENSG00000070950	RAD18	64.91	269.98	52.28	137.22	90
ENSG00000070961	ATP2B1	719.72	397	1201.5	1328.09	671
ENSG00000071051	NCK2	194.22	119	135.16	133.64	83.82
ENSG00000071054	MAP4K4	45.3	62.61	75.19	74.74	34.62
ENSG00000071073	MGAT4A	0	0.67	1.33	1.67	0
ENSG00000071082	RPL31	28.27	16.11	20.4	17.77	0
ENSG00000071127	WDR1	71.01	154.41	116.47	68.76	116.32
ENSG00000071189	SNX13	386.69	236.85	410.46	433.13	392.86
ENSG00000071205	ARHGAP10	273	310.42	186.78	267.91	272.29
ENSG00000071242	RPS6KA2	1252.33	547.08	769.56	1265.4	1100.2
ENSG00000071243	ING3	21.87	87.32	63.9	20.84	52
ENSG00000071246	VASH1	86.87	27	41	33	40.3
ENSG00000071282	LMCD1	51.07	92.98	75.58	26.1	70.2
ENSG00000071462	BUD23	333.9	540.14	504.58	472.67	388.4
ENSG00000071537	SEL1L	1245.82	1016.8	1696.09	2050.73	1685.23
ENSG00000071539	TRIP13	14	793	70	308	140
ENSG00000071564	TCF3	366.71	411.13	382.93	381.53	325.71
ENSG00000071575	TRIB2	0	2.43	0	16.41	0.67
ENSG00000071626	DAZAP1	11	35.71	28.86	57.28	27.66
ENSG00000071655	MBD3	129.93	150.67	86.75	82.57	192.19
ENSG00000071794	HLTF	67.51	66.63	89.66	88.4	65.88
ENSG00000071859	FAM50A	714.1	1049	948	1024.92	747.86
ENSG00000071889	FAM3A	59.37	34.44	37.3	50.84	41.32
ENSG00000071894	CPSF1	842.5	900.5	671.5	523	602.34
ENSG00000071967	CYBRD1	2479.11	537.82	890.69	1252.02	2274.74
ENSG00000071994	PDCD2	286.42	378.48	308.85	341.22	281.54
ENSG00000072041	SLC6A15	16.1	1.51	2.85	0	5.94
ENSG00000072042	RDH11	346.61	367.39	577.88	423.11	238.08
ENSG00000072062	PRKACA	161.97	490.18	258.33	192.65	417.23
ENSG00000072071	ADGRL1	19.63	18.44	16.6	0	0
ENSG00000072110	ACTN1	6877.33	15842.86	13766.59	12677.08	7783.58
ENSG00000072121	ZFYVE26	584.96	613.1	473.91	747.99	597.38
ENSG00000072133	RPS6KA6	3.5	22	0	15.5	67
ENSG00000072135	PTPN18	6.97	27.22	15.87	13.86	9.97
ENSG00000072163	LIMS2	32.02	7.87	42.42	0	14.4
ENSG00000072195	SPEG	608.07	532.83	443.18	236.94	730.68
ENSG00000072274	TFRC	234.98	262.48	10.32	235.15	224.62
ENSG00000072310	SREBF1	1658.7	652.55	1792.58	1817.73	882.75
ENSG00000072364	AFF4	1028.01	897.81	1249.23	1159.85	1098.86
ENSG00000072401	UBE2D1	5.07	0	1.74	10.37	3.07
ENSG00000072415	MPP5	102.57	154.92	120.37	136.17	119.6
ENSG00000072422	RHOBTB1	145.5	81.5	231	144.5	96
ENSG00000072501	SMC1A	218.41	240.8	89.35	106.11	61.53
ENSG00000072506	HSD17B10	186.57	536.12	378.97	362.87	202.36
ENSG00000072518	MARK2	9.72	24.94	18.81	8.58	10.47
ENSG00000072571	HMMR	0	235.79	0	140.15	87.22
ENSG00000072609	CHFR	173.68	201.87	180.99	206.66	221.6
ENSG00000072657	TRHDE	112	14	35	81	96
ENSG00000072682	P4HA2	251.87	274.1	338.38	292.93	254.91
ENSG00000072736	NFATC3	30.99	35.17	0	190.76	209.05
ENSG00000072756	TRNT1	50	58.33	91.87	68.12	74.87
ENSG00000072778	ACADVL	0	215.77	60.81	56.44	41.11
ENSG00000072786	STK10	590.37	934.91	492.91	608.02	521.01
ENSG00000072803	FBXW11	204.62	282.96	115.58	223.05	203.72
ENSG00000072818	ACAP1	10	4.35	11	6	2
ENSG00000072840	EVC	1923	550.28	1021	902.77	1035
ENSG00000072849	DERL2	167.85	354.1	229.04	213.17	175.32
ENSG00000072864	NDE1	65.88	148.11	58.18	99.33	70.06
ENSG00000072952	IRAG1	0	6.01	0	0.42	2.23
ENSG00000072954	TMEM38A	5	4.82	3.39	1	1
ENSG00000072958	AP1M1	777.96	1312.51	780.95	684.39	766.97
ENSG00000073008	PVR	75.36	326.61	253.83	273.59	392.18
ENSG00000073111	MCM2	100.63	1901.54	254.03	820.37	600.87
ENSG00000073150	PANX2	56.32	76	89	160	48
ENSG00000073331	ALPK1	0	0	117.22	17.33	20.59
ENSG00000073350	LLGL2	2	0	17.27	1	2
ENSG00000073417	PDE8A	107.25	267.71	160.83	132.92	131.38
ENSG00000073464	CLCN4	62	0	14.83	42	0
ENSG00000073536	NLE1	122.72	233.03	209.69	198.85	160.09
ENSG00000073578	SDHA	1873.5	2162.41	1584.33	1580.68	1661.11
ENSG00000073584	SMARCE1	46.35	107.69	53.37	112.42	21.91
ENSG00000073614	KDM5A	737	740	797	717	619.9
ENSG00000073711	PPP2R3A	502.47	547.74	349.65	388	360.7
ENSG00000073712	FERMT2	567.29	724.46	884.6	966.71	851.2
ENSG00000073756	PTGS2	47	118	178	118	31
ENSG00000073792	IGF2BP2	368.98	489.44	508.47	464.79	407.1
ENSG00000073849	ST6GAL1	3.5	0	35.05	3.26	2.97
ENSG00000073910	FRY	0	24.58	35.03	4.11	0
ENSG00000073921	PICALM	197.54	158.4	181.07	160.71	92.81
ENSG00000073969	NSF	669.85	1115	790.84	757.81	666.02
ENSG00000074047	GLI2	30.5	99.03	46.5	50.5	136.24
ENSG00000074054	CLASP1	73.96	38.32	76.27	60.9	44.2
ENSG00000074071	MRPS34	30.5	75.79	40.78	34.87	23.6
ENSG00000074181	NOTCH3	351.78	731.82	691.66	355.24	420.56
ENSG00000074201	CLNS1A	146.5	193	182.93	161.03	138.26
ENSG00000074219	TEAD2	285.22	120.17	136.76	57.42	72.68
ENSG00000074266	EED	52.37	114.52	40.89	68.98	41.04
ENSG00000074319	TSG101	550.96	744.67	704.51	665.4	688.88
ENSG00000074356	NCBP3	291	401	292	328	333
ENSG00000074370	ATP2A3	0	0.51	221	294.29	191
ENSG00000074410	CA12	5.83	10.43	25.74	37.59	22.13
ENSG00000074416	MGLL	59.99	135	42.71	0	0
ENSG00000074527	NTN4	101.66	250.74	244.5	391.09	780.16
ENSG00000074582	BCS1L	17.64	43.69	26.77	25.6	12.64
ENSG00000074590	NUAK1	143.78	90.51	118.78	108.97	100.77
ENSG00000074603	DPP8	0	166.29	62	33.07	107.99
ENSG00000074621	SLC24A1	50.87	18.73	102.44	101.15	105.09
ENSG00000074657	ZNF532	296.37	198.43	200.72	211.58	210.37
ENSG00000074660	SCARF1	9	2.78	0	8.63	0
ENSG00000074695	LMAN1	2218	1285	2708	2043	1743
ENSG00000074696	HACD3	396.98	915.84	433.2	484.77	385
ENSG00000074706	IPCEF1	4	0	0	1	2
ENSG00000074755	ZZEF1	1184.21	1229.14	911.94	875.94	840.72
ENSG00000074800	ENO1	4.89	0	19.63	9.97	0
ENSG00000074842	MYDGF	1412	2046	1707	1572	1147
ENSG00000074855	ANO8	252.45	194	177	125.33	136
ENSG00000074935	TUBE1	91.61	36.91	190.88	139.56	171.76
ENSG00000074964	ARHGEF10L	524.25	459.96	545.3	613.43	506.73
ENSG00000074966	TXK	2	0	1.24	1	0
ENSG00000075089	ACTR6	7.99	11.89	20.78	23.29	10.42
ENSG00000075131	TIPIN	11.32	0	11.38	40.02	29.27
ENSG00000075142	SRI	454.27	474	562.58	431.86	383.81
ENSG00000075188	NUP37	69	195	96	94	39.5
ENSG00000075213	SEMA3A	164	154.5	197	233.5	261.18
ENSG00000075218	GTSE1	19	1932	87	505	364
ENSG00000075223	SEMA3C	791	652	715	922	962.5
ENSG00000075234	TTC38	288.61	348	227	206.49	163.87
ENSG00000075239	ACAT1	895.83	835	733	733.21	632
ENSG00000075240	GRAMD4	74.52	26	37.34	47	54.56
ENSG00000075275	CELSR1	8	40.3	265	104	3.9
ENSG00000075292	ZNF638	34.84	27.73	20.88	46.39	14.72
ENSG00000075303	SLC25A40	66	73	46	69	65
ENSG00000075336	TIMM21	59	137.84	45.35	121.46	91.98
ENSG00000075391	RASAL2	318.3	855.49	410.42	616.91	477.62
ENSG00000075399	VPS9D1	430.16	289.9	355.03	242.09	262.21
ENSG00000075407	ZNF37A	54.5	29.5	53.5	74.5	37.5
ENSG00000075413	MARK3	373.5	393.23	505.1	377.3	465.43
ENSG00000075415	SLC25A3	1103.5	1520.28	1224.71	1235.8	992.76
ENSG00000075420	FNDC3B	734.67	503.67	1065.67	805.67	703
ENSG00000075426	FOSL2	4.51	10.83	30.46	18.16	11.38
ENSG00000075568	TMEM131	1195	1189.7	1190.67	1271.67	1353.36
ENSG00000075618	FSCN1	3968	4764	3768	3262	2840
ENSG00000075624	ACTB	15921.54	41601.89	30842.07	23776.77	17703.31
ENSG00000075643	MOCOS	330	500	532	845	220
ENSG00000075651	PLD1	39.67	0	80.62	18.49	36.31
ENSG00000075702	WDR62	26	859.56	25.15	218.59	100.87
ENSG00000075711	DLG1	2.21	2.39	3.91	2.3	0
ENSG00000075785	RAB7A	650.73	1054.88	818.11	1093.25	805.33
ENSG00000075790	BCAP29	28.96	49.37	67.69	65.56	29.06
ENSG00000075826	SEC31B	129.86	21.7	37	33.53	42.8
ENSG00000075856	SART3	540.7	830.56	563.91	614.37	498.28
ENSG00000075886	TUBA3D	6.82	1.51	0	3	3
ENSG00000075914	EXOSC7	201	315	297	205	168
ENSG00000075945	KIFAP3	596.94	298.54	350	383.88	475
ENSG00000075975	MKRN2	293.66	309.34	362	356.46	268.99
ENSG00000076003	MCM6	291	1809	407	892	681
ENSG00000076043	REXO2	472.96	456.96	742.19	715.81	652.16
ENSG00000076053	RBM7	55.58	39.63	0	73.1	0.03
ENSG00000076067	RBMS2	316.92	500.7	566.03	341.03	391.8
ENSG00000076248	UNG	4.43	193.36	13.7	41.09	78.65
ENSG00000076258	FMO4	76	15	37	13	14
ENSG00000076321	KLHL20	317	333	298	257	257
ENSG00000076344	RGS11	3	0	11.73	23	0
ENSG00000076351	SLC46A1	60.64	47.12	50.42	22.94	15.52
ENSG00000076356	PLXNA2	167	186	177	120	229
ENSG00000076382	SPAG5	38.49	2897.43	160.7	892.94	513.59
ENSG00000076513	ANKRD13A	1511.16	2398.92	1636.46	1368	1254.43
ENSG00000076555	ACACB	178.28	59.06	30.74	52.65	44.45
ENSG00000076604	TRAF4	296	433.86	445.39	412.78	220.51
ENSG00000076641	PAG1	47	35	92	71	17
ENSG00000076650	GPATCH1	121	170	145	141	132
ENSG00000076662	ICAM3	58	103.77	64	104	86.63
ENSG00000076685	NT5C2	296.2	352.26	435.47	421.24	378.56
ENSG00000076706	MCAM	6	533	465	247	45
ENSG00000076716	GPC4	0	26	12	16	82
ENSG00000076924	XAB2	761	898	640	645	550
ENSG00000076928	ARHGEF1	0.95	185.39	0	462.74	356.46
ENSG00000076944	STXBP2	56.08	29.42	64.4	31	22
ENSG00000076984	MAP2K7	7	7.85	9.03	0	16.75
ENSG00000077044	DGKD	143	174.65	180	202	160.24
ENSG00000077063	CTTNBP2	1.53	123.58	72	160.23	82.9
ENSG00000077097	TOP2B	272.1	193.86	248.42	242.92	275.7
ENSG00000077147	TM9SF3	1564.29	1370.79	1718.73	1862	1555.95
ENSG00000077150	NFKB2	78.57	144.56	185.53	217.22	140.82
ENSG00000077152	UBE2T	16	488	51	147	78
ENSG00000077157	PPP1R12B	60.33	50.16	72.4	23.04	29.28
ENSG00000077232	DNAJC10	1066.37	917.96	1739.56	1651.12	1401.13
ENSG00000077235	GTF3C1	1761	1243.96	1346.57	1106.53	1155.09
ENSG00000077238	IL4R	132.61	171.58	198.09	293	97.2
ENSG00000077254	USP33	0	209.77	156.2	68.72	62.32
ENSG00000077312	SNRPA	11.85	51.41	32.04	17.53	4.16
ENSG00000077348	EXOSC5	56	134.62	64.77	74.64	87
ENSG00000077380	DYNC1I2	659.65	850.72	806.17	918.73	740.08
ENSG00000077420	APBB1IP	655	692.59	352	360	537
ENSG00000077454	LRCH4	355	603	363	308.24	303.16
ENSG00000077458	FAM76B	1.68	0	11.97	0	3.24
ENSG00000077463	SIRT6	144.97	203.49	182.35	161	120.85
ENSG00000077514	POLD3	17.77	261.82	78.09	120.73	57.48
ENSG00000077549	CAPZB	1281.5	2160.58	1518.12	1651.41	1309.58
ENSG00000077585	GPR137B	120.5	94.73	194	150.01	138.83
ENSG00000077616	NAALAD2	1.46	0	5.66	0	2.83
ENSG00000077684	JADE1	88.77	122.87	176.72	138.7	128.34
ENSG00000077713	SLC25A43	219	185	218	266	218
ENSG00000077782	FGFR1	110.1	265.27	153.43	177.36	117.22
ENSG00000077942	FBLN1	18738.68	3653.77	2178.14	5732.49	4530.34
ENSG00000077943	ITGA8	4562	2089	896	2417	375
ENSG00000078018	MAP2	24.13	16.01	13.46	1.06	4.64
ENSG00000078043	PIAS2	101.77	85.51	92.84	105.89	113.89
ENSG00000078053	AMPH	96.51	462.75	269.38	247.11	148.96
ENSG00000078061	ARAF	560.98	728.09	548.85	564.11	555.55
ENSG00000078070	MCCC1	0	0	8.12	25.01	17.08
ENSG00000078098	FAP	1998.6	641.74	2201.71	2010.96	1.35
ENSG00000078124	ACER3	49.21	59	17.44	35.55	22.26
ENSG00000078140	UBE2K	262.93	405.5	301	314	254
ENSG00000078142	PIK3C3	362.43	331.44	412.35	452.51	366.08
ENSG00000078177	N4BP2	135.55	52.73	96.88	140.99	127
ENSG00000078237	TIGAR	114	151	150	146	110
ENSG00000078246	TULP3	349.78	377	332.01	374.78	418.61
ENSG00000078269	SYNJ2	1284.19	860.37	444.65	817.75	1096.85
ENSG00000078295	ADCY2	1	0	2	8	14.24
ENSG00000078304	PPP2R5C	268.87	175.26	193.85	158.29	277.13
ENSG00000078369	GNB1	1250.66	1756.67	1340.84	1438.35	1147.07
ENSG00000078401	EDN1	8	8	4	2	5
ENSG00000078403	MLLT10	78.78	61.96	78.87	51.73	68.89
ENSG00000078487	ZCWPW1	3.55	8.15	2.03	20.83	27.95
ENSG00000078618	NRDC	1724.05	3317.23	2943.8	2493.53	1697.67
ENSG00000078668	VDAC3	354.13	888.75	366.41	541.53	386.08
ENSG00000078674	PCM1	856.2	428.65	352.54	1138.03	731.59
ENSG00000078687	TNRC6C	188.77	132.83	83.03	90.66	91.02
ENSG00000078699	CBFA2T2	25.14	23.74	0	35.93	105.17
ENSG00000078725	BRINP1	29.05	0	4	2	7
ENSG00000078747	ITCH	4.06	122.77	36.98	0	3.65
ENSG00000078804	TP53INP2	27.5	28.5	36	23.5	37.5
ENSG00000078808	SDF4	40.15	14.54	116.52	72.5	46.3
ENSG00000078814	MYH7B	10.23	0	0.96	0.93	4.55
ENSG00000078902	TOLLIP	162.99	286	267.64	274.26	235.18
ENSG00000078967	UBE2D4	25	14	15	24	24
ENSG00000079101	CLUL1	0	0	0.33	0.33	5
ENSG00000079134	THOC1	167.13	261.34	158.29	220.43	172.68
ENSG00000079150	FKBP7	196.27	168.85	142.71	123.86	104.93
ENSG00000079156	OSBPL6	0	6.87	10.36	12.21	0
ENSG00000079215	SLC1A3	66	20.02	190	79.9	23.68
ENSG00000079246	XRCC5	1138.02	2979.4	1742.98	1911.29	1319.47
ENSG00000079277	MKNK1	51.82	7.16	13.41	24.84	27.57
ENSG00000079308	TNS1	485.87	216.44	0	317.78	486.71
ENSG00000079313	REXO1	380	886.83	385.81	488.17	454.6
ENSG00000079332	SAR1A	141.25	136.25	142.46	115.7	96.25
ENSG00000079387	SENP1	84.5	103.03	81.52	81.67	78.76
ENSG00000079432	CIC	1165.89	1307.09	995.57	1042.91	859.14
ENSG00000079435	LIPE	26.22	67.89	39.53	37.68	29.86
ENSG00000079462	PAFAH1B3	24.38	67.64	39.32	46.06	27.06
ENSG00000079482	OPHN1	63	40	62	82	87
ENSG00000079616	KIF22	67.47	1966.19	111.18	644.55	397.57
ENSG00000079691	CARMIL1	305	229	344	307	285
ENSG00000079739	PGM1	670.96	665	780.79	830.4	582.2
ENSG00000079785	DDX1	622.5	800.54	829.22	1002	769
ENSG00000079805	DNM2	0	43.29	0	140.55	77.97
ENSG00000079819	EPB41L2	281.8	191.06	240.95	184.6	141.45
ENSG00000079931	MOXD1	989	435.71	731	640	727
ENSG00000079950	STX7	244	194	247	223	221
ENSG00000079974	RABL2B	0	0	4.3	3.56	4.39
ENSG00000079999	KEAP1	567	596.98	522	532.63	504
ENSG00000080007	DDX43	26	28	19	25	1
ENSG00000080031	PTPRH	5	10	13	16	7
ENSG00000080189	SLC35C2	28.3	6.62	8.63	33.92	18.75
ENSG00000080200	CRYBG3	1408.75	274.33	424.8	549	545
ENSG00000080298	RFX3	6.53	3.94	14.69	6.77	5.38
ENSG00000080345	RIF1	223.95	133.49	91.94	129	112.27
ENSG00000080371	RAB21	117	196	153	215	199
ENSG00000080493	SLC4A4	14.15	130.4	73.01	112.02	32.5
ENSG00000080503	SMARCA2	1155.84	504.4	378.81	525.93	538.59
ENSG00000080546	SESN1	49.79	30.25	52.73	38.93	60.3
ENSG00000080561	MID2	45.46	17.93	75.04	28.93	5.46
ENSG00000080573	COL5A3	665	590	1419	520	2574
ENSG00000080603	SRCAP	618.01	712.91	568.96	387.28	345.6
ENSG00000080608	PUM3	241	398	483	442	340
ENSG00000080802	CNOT4	35.74	53.05	89.57	54.13	31.47
ENSG00000080815	PSEN1	199.04	186.82	279.06	281.98	190.09
ENSG00000080819	CPOX	273	372	240	326	237
ENSG00000080822	CLDND1	8.24	2.62	2.52	5	0
ENSG00000080824	HSP90AA1	1540.34	3693.05	2257	2583.66	2351.44
ENSG00000080839	RBL1	55	417	71.24	216.8	191
ENSG00000080910	CFHR2	6	11.96	9	7	10
ENSG00000080986	NDC80	14	742	54	377.83	238.95
ENSG00000081014	AP4E1	69.81	125.59	237.04	195.45	111.59
ENSG00000081026	MAGI3	128	117.27	101.39	115.69	101.27
ENSG00000081051	AFP	0	2	1	1	2
ENSG00000081052	COL4A4	3	8	63	72	39
ENSG00000081059	TCF7	3.52	13.77	5.89	11.45	33.84
ENSG00000081087	OSTM1	159	297	362	368	188
ENSG00000081148	IMPG2	0	3	2	1	2
ENSG00000081154	PCNP	498	434	550	501	405
ENSG00000081177	EXD2	102.14	121.91	124	132	112
ENSG00000081181	ARG2	9	28	63	35	27
ENSG00000081277	PKP1	0	26	26	0	3
ENSG00000081307	UBA5	0	0	5.47	18.31	4.63
ENSG00000081320	STK17B	132.5	252.77	158	246.5	185.33
ENSG00000081377	CDC14B	77.81	0	32.58	14.65	93.96
ENSG00000081386	ZNF510	47	42	39	54.5	44
ENSG00000081665	ZNF506	23.98	10	17	12.09	4.67
ENSG00000081692	JMJD4	10.07	66.06	12.26	52.67	0
ENSG00000081721	DUSP12	9.36	10.02	13.36	15.06	10.81
ENSG00000081760	AACS	316	358.16	288.93	261	125
ENSG00000081791	DELE1	258.97	183.62	197.28	246.5	212.5
ENSG00000081803	CADPS2	40.85	21.47	0	12.01	14.53
ENSG00000081818	PCDHB4	1	2	5	15.01	5.71
ENSG00000081853	PCDHGA2	66.29	12.08	29.3	58.86	75.85
ENSG00000081870	HSPB11	2.49	6.19	8.35	16.34	7.33
ENSG00000081913	PHLPP1	233	321	288	234	200
ENSG00000081923	ATP8B1	1290.84	2189.67	1307.17	2822.83	3349.09
ENSG00000082014	SMARCD3	8.88	11.72	13.41	0	7.57
ENSG00000082068	WDR70	317.21	348	365	332	313
ENSG00000082074	FYB1	0.5	0	3.39	1.67	1
ENSG00000082153	BZW1	366.98	1298.9	622.5	0	446.45
ENSG00000082196	C1QTNF3	2	1	0	0	1
ENSG00000082212	ME2	137.07	384.11	240.8	449.09	386.57
ENSG00000082213	C5orf22	70.74	148.99	126	105.14	102
ENSG00000082258	CCNT2	185.85	110.38	166.44	239.64	215.1
ENSG00000082269	FAM135A	8.31	11.1	6.75	23.27	25.53
ENSG00000082293	COL19A1	0	1	2	2	0
ENSG00000082397	EPB41L3	291.81	10.72	77.04	159.41	95.75
ENSG00000082438	COBLL1	41.45	37.34	0	38.8	0
ENSG00000082482	KCNK2	0	18.56	3.88	0	15.77
ENSG00000082497	SERTAD4	86	44	38	23	38
ENSG00000082512	TRAF5	78.67	52	73.33	86.67	62.33
ENSG00000082515	MRPL22	201.27	356.55	230.19	234.19	158.61
ENSG00000082516	GEMIN5	286	630	361	407	386
ENSG00000082641	NFE2L1	1265.63	831.04	2711.83	2573.36	2238.85
ENSG00000082701	GSK3B	248.91	300.19	315.94	383.12	324.59
ENSG00000082781	ITGB5	3546.56	3449.12	3048.23	3538.7	3470.42
ENSG00000082805	ERC1	69	61.85	80.48	71.71	50.89
ENSG00000082898	XPO1	448.33	1137.06	682.04	898.04	698.91
ENSG00000082996	RNF13	119.17	37.85	112.86	108.87	125.12
ENSG00000083093	PALB2	96.69	157	145.2	211.02	189
ENSG00000083097	DOP1A	55.95	13.3	40.49	22.73	61.3
ENSG00000083099	LYRM2	10.61	20.27	7.43	5.21	4
ENSG00000083123	BCKDHB	151.73	73.31	77.87	67.1	80.29
ENSG00000083168	KAT6A	423.1	385.45	300.52	382.5	393.83
ENSG00000083223	TUT7	506.29	334.89	502.29	554.45	467.18
ENSG00000083290	ULK2	280.55	180.5	138.5	202.53	201.01
ENSG00000083312	TNPO1	1510	2062.81	1209.01	2086.42	1841.09
ENSG00000083444	PLOD1	3486.41	3789.21	4088.27	3382.73	3137.36
ENSG00000083457	ITGAE	25	27	23	11	15
ENSG00000083520	DIS3	315.69	226.69	201.1	362.93	288.68
ENSG00000083535	PIBF1	146.16	106	208.72	153.47	68.42
ENSG00000083544	TDRD3	14.45	8.99	4.01	0	0
ENSG00000083635	NUFIP1	45	153	117	117	96
ENSG00000083642	PDS5B	710.47	338.58	328.3	423.33	362.95
ENSG00000083720	OXCT1	274	610	266.87	482	432
ENSG00000083750	RRAGB	114	49.11	126.76	80.16	66.49
ENSG00000083799	CYLD	135.33	318.33	227.33	228.43	147.33
ENSG00000083807	SLC27A5	2.38	0.38	0.83	0	0
ENSG00000083812	ZNF324	47.52	52.06	36.61	51.5	37.09
ENSG00000083814	ZNF671	74	70	51	58	53
ENSG00000083817	ZNF416	54	44	76	57	50
ENSG00000083828	ZNF586	29.69	23.94	17.4	6.45	0
ENSG00000083844	ZNF264	50.5	43.5	37.5	55.5	34.5
ENSG00000083845	RPS5	650.46	718.86	692.54	809.58	880.58
ENSG00000083857	FAT1	8068.65	7721.58	12466.89	11632.07	10939.64
ENSG00000083896	YTHDC1	344.27	308.93	348.57	317.22	297.16
ENSG00000083937	CHMP2B	148	147	149	159	131.23
ENSG00000084073	ZMPSTE24	529	722	560	609	595
ENSG00000084090	STARD7	846	783	668	544	428.62
ENSG00000084092	NOA1	590	509	554	491	464
ENSG00000084112	SSH1	1038.35	954.58	766.28	992.95	1259.91
ENSG00000084207	GSTP1	4.42	8.69	0	9.65	0
ENSG00000084234	APLP2	274.59	242.57	293.61	246.53	220.56
ENSG00000084463	WBP11	416	1128	442	676.51	608
ENSG00000084623	EIF3I	1339.74	2855.43	2043.9	2116.1	1737.03
ENSG00000084636	COL16A1	6836.86	3767.04	7480.87	6271.69	7277.84
ENSG00000084652	TXLNA	474	525.5	431	436.5	379
ENSG00000084676	NCOA1	134.79	53.09	74.58	112.5	73.52
ENSG00000084693	AGBL5	33.86	0	35.68	28.89	68.26
ENSG00000084731	KIF3C	271	206	190	140.5	179
ENSG00000084733	RAB10	253	339	391	435	323
ENSG00000084734	GCKR	0	4.46	0	3.26	6.73
ENSG00000084754	HADHA	2419.13	3487.02	2286.15	2583.16	2047.1
ENSG00000084764	MAPRE3	62.14	61.04	101.49	66.9	82.49
ENSG00000084774	CAD	950.78	1873.7	1178.45	1301.14	1113.59
ENSG00000085063	CD59	59.93	87.66	38.54	57.48	72.86
ENSG00000085117	CD82	197.88	199.32	488.26	293.19	82.53
ENSG00000085185	BCORL1	79.99	56.8	74.21	45.14	50.53
ENSG00000085224	ATRX	1282.3	393.39	841.38	797.64	870.27
ENSG00000085231	AK6	74.74	68.34	136.1	131.49	97.11
ENSG00000085274	MYNN	75.54	60.16	101.8	75.53	77.54
ENSG00000085365	SCAMP1	168.2	107.41	137.26	195.38	175.26
ENSG00000085377	PREP	93.26	87.66	235.97	19.58	69.35
ENSG00000085382	HACE1	138.08	128.06	179	197.76	157.64
ENSG00000085415	SEH1L	181.72	298.5	249.08	250.31	196.67
ENSG00000085433	WDR47	64.94	36.12	16.02	75.97	28.37
ENSG00000085449	WDFY1	389.18	462.54	707.18	663.33	455.4
ENSG00000085465	OVGP1	55	7	15	7	11
ENSG00000085491	SLC25A24	445.96	601.43	472	467	475.76
ENSG00000085511	MAP3K4	186.57	166.57	175.88	148.88	87.95
ENSG00000085552	IGSF9	0	3	4	1	0
ENSG00000085563	ABCB1	3.5	22	17.5	0	4
ENSG00000085644	ZNF213	15.74	20.64	17.25	13.65	20.09
ENSG00000085662	AKR1B1	1232.85	1678.86	7571.66	2822.08	1451.09
ENSG00000085719	CPNE3	780	568.07	604.8	591	479.44
ENSG00000085741	WNT11	326	1	0	1	18
ENSG00000085760	MTIF2	85.67	104.66	118.77	123.26	88.26
ENSG00000085788	DDHD2	200.01	150.11	154.32	172.58	157.94
ENSG00000085832	EPS15	703	455	633.04	637	611
ENSG00000085840	ORC1	5.5	148	12	43	25
ENSG00000085871	MGST2	4	5	6	7	7.67
ENSG00000085872	CHERP	377.65	584.84	377.74	498.58	448.06
ENSG00000085998	POMGNT1	9.88	130.14	47.19	5.5	21.45
ENSG00000085999	RAD54L	0.82	103.76	8.51	27.81	20.06
ENSG00000086015	MAST2	1619	1952.27	1425.21	1649	1788.4
ENSG00000086061	DNAJA1	1768	2074	1856	1528	1310
ENSG00000086062	B4GALT1	19.36	20.56	118.8	40.56	101.6
ENSG00000086065	CHMP5	25.46	29.18	0	15.43	18.57
ENSG00000086102	NFX1	268.78	335.82	460.64	373.24	437.84
ENSG00000086189	DIMT1	168	302.51	228	252	146.12
ENSG00000086200	IPO11	47.84	381.79	108.39	344.41	103.95
ENSG00000086232	EIF2AK1	1008	1244.17	1134	993	957
ENSG00000086289	EPDR1	4.72	16.89	3.9	15.93	7.5
ENSG00000086475	SEPHS1	490.26	845.98	470.81	589.47	448.55
ENSG00000086504	MRPL28	100.97	194.82	164.55	120.84	94.96
ENSG00000086544	ITPKC	221	202	284	219	212
ENSG00000086548	CEACAM6	1	1	129	0	0
ENSG00000086570	FAT2	3	6	76.58	5	2.64
ENSG00000086589	RBM22	247	374.88	250.94	237.93	246
ENSG00000086598	TMED2	882	1038.92	962.59	932.16	698.96
ENSG00000086619	ERO1B	34	28.47	50.26	55	47.88
ENSG00000086666	ZFAND6	15.01	15.68	17.68	17.88	21.73
ENSG00000086696	HSD17B2	43.12	0	7.28	9.57	9.78
ENSG00000086712	TXLNG	87	105	95	103	135
ENSG00000086717	PPEF1	2	0	1	0	1
ENSG00000086758	HUWE1	2744.38	3004.85	2879.22	2921.01	2878.37
ENSG00000086827	ZW10	198	453	244.16	308	223.63
ENSG00000086848	ALG9	17	35.67	51.96	87.01	64.02
ENSG00000087008	ACOX3	45.19	162.69	82.22	82.34	55.72
ENSG00000087074	PPP1R15A	817.43	1514.76	1324.48	1808.85	1264.38
ENSG00000087076	HSD17B14	1.46	6.75	4.54	5.65	3.99
ENSG00000087077	TRIP6	2157	2767.76	2059.99	1916.81	1819.98
ENSG00000087086	FTL	17445	17661	22468	25075	15775
ENSG00000087087	SRRT	547.1	1054.98	540.32	748.27	685.99
ENSG00000087088	BAX	746.26	724.08	793.64	633.62	394.92
ENSG00000087095	NLK	47.93	78.31	80.2	50	56.38
ENSG00000087111	PIGS	17.93	84.89	0	0	18.73
ENSG00000087116	ADAMTS2	4211.39	2041.09	1542.56	2840.94	5772.82
ENSG00000087152	ATXN7L3	95.13	130.77	103.73	106.29	176.5
ENSG00000087157	PGS1	232.6	266.51	223.61	142	192.29
ENSG00000087191	PSMC5	1104.13	2380.17	1583.64	1556.84	1146.63
ENSG00000087206	UIMC1	93.08	108.06	120.18	122.94	108.61
ENSG00000087245	MMP2	5239.71	2757.18	3651.77	5038.31	3992.36
ENSG00000087253	LPCAT2	138	291.48	112	115.74	288
ENSG00000087258	GNAO1	10.98	2	3	0	3
ENSG00000087263	OGFOD1	436	866.71	636	608	426
ENSG00000087266	SH3BP2	43.75	17.6	0	51	32.63
ENSG00000087269	NOP14	238	485.5	337	441.5	332.5
ENSG00000087274	ADD1	453.39	5.18	17.26	225.73	149.04
ENSG00000087301	TXNDC16	80	54	31	36	49.09
ENSG00000087302	RTRAF	431	726.44	727.16	628	538
ENSG00000087303	NID2	4533.49	1053.48	2747.96	2044.32	2155.65
ENSG00000087338	GMCL1	109	119	98	155	121
ENSG00000087448	KLHL42	179.26	218.01	195.18	221.93	157.22
ENSG00000087460	GNAS	2	0	1	1.91	0
ENSG00000087502	ERGIC2	276.3	340.27	290.83	377.23	252.81
ENSG00000087510	TFAP2C	612	565	315.74	331	192.04
ENSG00000087586	AURKA	2.42	175.03	7.86	44.13	33.19
ENSG00000087589	CASS4	1	10	0	0	1
ENSG00000087842	PIR	80.5	25	88	78.5	44
ENSG00000087884	AAMDC	0	8.12	9.21	10.97	4.66
ENSG00000087903	RFX2	8.21	18.88	4.13	0	15.16
ENSG00000087995	METTL2A	80.01	223.68	118.35	136.66	145.25
ENSG00000088035	ALG6	60.89	81.65	78.24	35.68	52.63
ENSG00000088038	CNOT3	257.86	348.2	301.45	239.91	198.26
ENSG00000088179	PTPN4	89.78	76.61	98.71	75.45	87.04
ENSG00000088205	DDX18	339.08	630.16	573	607	408.54
ENSG00000088247	KHSRP	94.79	114.23	108.8	127.68	118.74
ENSG00000088256	GNA11	672.22	1036.12	587.65	634.9	586.25
ENSG00000088280	ASAP3	501.84	277.15	355.62	473.23	454.31
ENSG00000088298	EDEM2	500.17	356	385	260.14	266
ENSG00000088325	TPX2	0	57.1	0	44.89	16.1
ENSG00000088356	PDRG1	41	82	50	47	41
ENSG00000088367	EPB41L1	21.52	3.29	7.76	27.04	19.49
ENSG00000088387	DOCK9	19.26	28.47	33	95.4	0
ENSG00000088448	ANKRD10	427.25	109.88	204.87	195.72	162.3
ENSG00000088451	TGDS	42	60	64	62	44
ENSG00000088538	DOCK3	9	13	13	13	20
ENSG00000088543	C3orf18	11.8	12.33	6.6	8.12	5
ENSG00000088682	COQ9	127.78	230.9	139.75	179.66	163.56
ENSG00000088727	KIF9	0	1.76	1.5	1.61	0
ENSG00000088756	ARHGAP28	0	3.41	9.29	21.81	18
ENSG00000088766	CRLS1	193.37	178.1	221.73	207.1	163
ENSG00000088808	PPP1R13B	48.96	52	25.63	43.64	46
ENSG00000088812	ATRN	675.25	617.66	920.52	733.21	628.78
ENSG00000088826	SMOX	40.84	31.19	48.6	39.06	15.16
ENSG00000088832	FKBP1A	21	49	25	27	29
ENSG00000088833	NSFL1C	183.18	484.83	406.43	300.84	191.66
ENSG00000088836	SLC4A11	0	31	45.85	41	28.34
ENSG00000088854	C20orf194	401	306	270	336	354
ENSG00000088876	ZNF343	24.64	17.94	34.98	40.21	8.55
ENSG00000088882	CPXM1	47	15	26	2	0
ENSG00000088899	LZTS3	47.5	59	90	49.5	29.5
ENSG00000088930	XRN2	1645	2237	2030	2277	1603
ENSG00000088986	DYNLL1	8.8	12.6	10.4	10.6	7
ENSG00000089006	SNX5	237.08	455.98	255.14	318.32	211.43
ENSG00000089022	MAPKAPK5	108.35	162.37	130.43	170.47	89.73
ENSG00000089041	P2RX7	24	56.71	31.21	48.47	19.4
ENSG00000089048	ESF1	18.9	0	8.6	6.54	7.69
ENSG00000089050	RBBP9	26	61	30	40	28
ENSG00000089053	ANAPC5	679.06	1648.2	827.94	898.15	754.97
ENSG00000089057	SLC23A2	114.5	100	93.5	117.5	120.5
ENSG00000089063	TMEM230	21.1	15.3	16	18.59	15.44
ENSG00000089094	KDM2B	206.56	272.25	152.74	268.98	198.76
ENSG00000089123	TASP1	59	56	43	49	41
ENSG00000089127	OAS1	28	2.53	0	0	1
ENSG00000089154	GCN1	3011	4348	3421	3473	3096
ENSG00000089157	RPLP0	4697.32	6465.96	6085.37	6068.92	4679.78
ENSG00000089159	PXN	271.82	358	244.1	209.14	195.76
ENSG00000089163	SIRT4	8.79	6.13	7	5.63	12
ENSG00000089177	KIF16B	239.04	187	325.4	203.79	160.5
ENSG00000089195	TRMT6	72	242	151.92	143.21	85.44
ENSG00000089220	PEBP1	797	1108	744	801	605
ENSG00000089234	BRAP	66.71	83.77	204	50.26	83.24
ENSG00000089248	ERP29	1349.98	1055	1484.77	1206.61	959
ENSG00000089280	FUS	1031.04	4746.07	2057.72	2052.73	1625.76
ENSG00000089289	IGBP1	389	193.5	309	249.5	256.5
ENSG00000089327	FXYD5	63.98	136.96	77.4	65.4	65
ENSG00000089335	ZNF302	28.75	14.14	19.88	72.45	27.96
ENSG00000089351	GRAMD1A	189.16	170.92	289.6	189.87	166.22
ENSG00000089472	HEPH	0	41.49	62.26	201.45	60.98
ENSG00000089486	CDIP1	13.33	11.75	11.34	13.51	7.87
ENSG00000089505	CMTM1	0	5.86	14	10	8
ENSG00000089597	GANAB	1093.44	1310.4	1703.62	1246.67	1196.19
ENSG00000089639	GMIP	127.49	76.28	125.12	89.73	47.24
ENSG00000089685	BIRC5	1	40.82	0	14.67	1.99
ENSG00000089692	LAG3	0	8	0	4	1
ENSG00000089693	MLF2	244.63	387.55	312.75	242.5	205.4
ENSG00000089723	OTUB2	8	3	12.06	2	6
ENSG00000089737	DDX24	1391.59	2341.59	1815.61	1657.09	1758.84
ENSG00000089775	ZBTB25	23	16	18	25	28
ENSG00000089818	NECAP1	35.09	91.01	60.76	58.2	41.37
ENSG00000089820	ARHGAP4	11.37	10.87	0	0	21.23
ENSG00000089847	ANKRD24	0	5.17	6.5	0	6.88
ENSG00000089876	DHX32	313.34	367.45	333.88	411.66	312.95
ENSG00000089902	RCOR1	135	208	151	136	132
ENSG00000089916	GPATCH2L	108.85	211.05	152.75	175.87	165.46
ENSG00000090006	LTBP4	228.8	222.23	230.71	144.62	101.86
ENSG00000090013	BLVRB	4.3	4.32	4.24	7.64	5.55
ENSG00000090020	SLC9A1	407	419.81	476.55	543	392.77
ENSG00000090054	SPTLC1	810.88	716.85	821.44	788.52	824.62
ENSG00000090060	PAPOLA	913.1	765.49	1004.39	928.72	824.84
ENSG00000090061	CCNK	112.57	144.57	96	163.22	114.61
ENSG00000090097	PCBP4	5.89	17.27	13.5	5.1	5.52
ENSG00000090238	YPEL3	4.42	0	1.49	7.25	0
ENSG00000090263	MRPS33	9.75	17	15.25	10.7	9.5
ENSG00000090266	NDUFB2	43.61	80.67	85	81	46.24
ENSG00000090273	NUDC	2.18	1.58	4.84	0	0
ENSG00000090316	MAEA	503.97	817.68	533.3	616.33	552.14
ENSG00000090339	ICAM1	134	79.25	512	148.2	53.06
ENSG00000090372	STRN4	133.11	286.78	166.33	213.96	245.47
ENSG00000090376	IRAK3	113.53	81.39	283.38	110	72
ENSG00000090432	MUL1	207	287	183	271	166
ENSG00000090447	TFAP4	71	68	60	98	41.43
ENSG00000090470	PDCD7	336	264	211	255	231
ENSG00000090487	SPG21	267.74	229.46	317.36	332.82	215.82
ENSG00000090520	DNAJB11	224.69	414	411.5	344.58	262.68
ENSG00000090530	P3H2	11.75	21.13	61.73	0	15.86
ENSG00000090539	CHRD	73.03	20.24	0	29.32	0.25
ENSG00000090554	FLT3LG	22.44	13.38	11.89	9.14	7.35
ENSG00000090565	RAB11FIP3	360.63	251.03	253.63	338.61	339.55
ENSG00000090581	GNPTG	681.87	469.66	536.04	556	521.37
ENSG00000090612	ZNF268	68.12	48.3	68.68	95.51	61
ENSG00000090615	GOLGA3	1221.78	1113.5	1110.19	929.45	905.47
ENSG00000090621	PABPC4	1040.55	1501.11	1245.33	1554.33	1440.69
ENSG00000090661	CERS4	35.67	1	8	0	3
ENSG00000090674	MCOLN1	437.74	359.05	284.52	379.05	323.33
ENSG00000090686	USP48	907.26	690.86	714.33	714.54	680.75
ENSG00000090776	EFNB1	489	143	74	95	91
ENSG00000090857	PDPR	177.12	216	145.48	289.28	212.26
ENSG00000090863	GLG1	1269.3	1299.81	1785.18	1347.03	1420.07
ENSG00000090889	KIF4A	23	1559	128	600	340
ENSG00000090924	PLEKHG2	1066.05	752.19	825.36	571.82	599.25
ENSG00000090932	DLL3	0	5	4	2.74	4
ENSG00000090971	NAT14	128	150	204	109	78
ENSG00000090975	PITPNM2	80.09	89.54	65.38	101.39	72.93
ENSG00000090989	EXOC1	0	17.35	24.47	25.77	0
ENSG00000091009	RBM27	221.32	311.16	261.71	348.41	246.81
ENSG00000091039	OSBPL8	20.09	17.7	76.4	56.15	106.12
ENSG00000091073	DTX2	40.72	37.58	25.23	32.44	0
ENSG00000091127	PUS7	0	32.03	0	42.79	11.88
ENSG00000091129	NRCAM	289.38	12.21	156.95	18.92	36.1
ENSG00000091136	LAMB1	17707.5	4409.52	9464.04	5766.62	3924.43
ENSG00000091140	DLD	244	416.5	381.71	368	261
ENSG00000091157	WDR7	257	385	239	236	279
ENSG00000091317	CMTM6	93	127	129	168	152
ENSG00000091409	ITGA6	27.33	132.46	35.22	68.94	70.86
ENSG00000091436	MAP3K20	103.3	233.52	117.95	195.01	105.75
ENSG00000091483	FH	1221	1772	987	966	731
ENSG00000091527	CDV3	43.26	173.48	345.39	280.91	346.96
ENSG00000091536	MYO15A	0.61	0	0.59	0	0.61
ENSG00000091542	ALKBH5	507	425	402	386	416
ENSG00000091592	NLRP1	46.26	24.45	12.26	26.93	36.55
ENSG00000091622	PITPNM3	0	10.37	0	6	17.94
ENSG00000091640	SPAG7	328	345.94	324.38	340.18	377.19
ENSG00000091651	ORC6	1.9	192	15	87.33	45.2
ENSG00000091656	ZFHX4	221.46	228.52	229.81	253.27	529.91
ENSG00000091732	ZC3HC1	127	317.75	179	172.44	129.3
ENSG00000091831	ESR1	0.88	1.06	1.72	0.86	0.25
ENSG00000091844	RGS17	6.5	2	4.5	4	2
ENSG00000091947	TMEM101	68.22	83.86	114.2	83.46	59.9
ENSG00000091986	CCDC80	4127.47	5904.36	2141.13	3179.61	5058.84
ENSG00000092010	PSME1	19.52	1.78	9.09	0	6.28
ENSG00000092020	PPP2R3C	239	289.26	332.3	388.02	228.71
ENSG00000092036	HAUS4	45.9	122.7	61.17	53.58	4.66
ENSG00000092068	SLC7A8	57.78	22.54	13.59	64.14	10.26
ENSG00000092094	OSGEP	64.51	238	101	117	98
ENSG00000092096	SLC22A17	85.64	59.74	59.82	58.81	57.85
ENSG00000092098	RNF31	317	364.39	354.39	320.52	269.17
ENSG00000092108	SCFD1	732.58	595	978.29	787.68	707.69
ENSG00000092140	G2E3	63.36	219.55	132.39	184.38	159.11
ENSG00000092148	HECTD1	1000.2	691.13	783.19	899.07	996.56
ENSG00000092199	HNRNPC	18.81	53.33	22.28	20.65	15.67
ENSG00000092201	SUPT16H	1132	2634	1295	1951	1491
ENSG00000092203	TOX4	293.51	448.82	356.12	379.05	271.64
ENSG00000092295	TGM1	3.3	2.29	9.78	2.27	4.44
ENSG00000092330	TINF2	6.1	0	1.59	0	0.99
ENSG00000092421	SEMA6A	16.34	0	6.56	5.72	0.76
ENSG00000092439	TRPM7	702.98	391.74	736.85	1106.63	779.47
ENSG00000092445	TYRO3	106.48	514.43	180.82	319.09	124.43
ENSG00000092470	WDR76	60	521	75	222	170
ENSG00000092529	CAPN3	15.51	12.93	0	12	4.67
ENSG00000092621	PHGDH	747.88	712.01	1733.64	1788.19	1773.17
ENSG00000092758	COL9A3	0	1	3	1.17	4
ENSG00000092820	EZR	121.33	1393	421.5	748	443
ENSG00000092841	MYL6	66.09	62.05	73	77.62	35.92
ENSG00000092853	CLSPN	0	667.87	60.31	327	234
ENSG00000092871	RFFL	19.25	18.25	14.62	17.22	17
ENSG00000092929	UNC13D	6.71	4	14.61	4.27	11.67
ENSG00000092931	MFSD11	32	32.31	31.93	31.47	35.97
ENSG00000092964	DPYSL2	14.03	4.98	9.48	14.73	14.75
ENSG00000092969	TGFB2	396.75	233.31	863.61	272.57	167.73
ENSG00000092978	GPATCH2	58.4	49.88	57.98	53.18	31.15
ENSG00000093000	NUP50	65.68	352.25	175.46	317.55	229.14
ENSG00000093009	CDC45	2.28	311.32	20.11	82.38	40.03
ENSG00000093010	COMT	225.93	189.61	204.88	152.67	200.97
ENSG00000093072	ADA2	3	1	3	0	1
ENSG00000093144	ECHDC1	97.97	52.32	92.09	81.31	58.01
ENSG00000093167	LRRFIP2	44.23	85.58	30.04	64.24	31.77
ENSG00000093183	SEC22C	56.23	105.56	60.72	76.32	41.49
ENSG00000094631	HDAC6	0	18.55	0	66.31	114.33
ENSG00000094804	CDC6	8.08	285.94	47	139	92.01
ENSG00000094841	UPRT	8.24	7.79	0	13.27	10.06
ENSG00000094880	CDC23	244.31	364.94	275.5	287.23	277.82
ENSG00000094916	CBX5	31.33	65.6	29.94	44.37	30.67
ENSG00000094963	FMO2	4	0	2.24	2.2	0
ENSG00000094975	SUCO	107.39	118.98	196.27	231.7	131.15
ENSG00000095002	MSH2	0	67.38	34.39	0	9.71
ENSG00000095015	MAP3K1	69	53	87	93	72
ENSG00000095059	DHPS	244.27	334.6	340.45	285.46	241.46
ENSG00000095066	HOOK2	167.35	232.48	222.41	188.27	139
ENSG00000095139	ARCN1	1574.05	1932.81	1966.1	1550.56	1401.69
ENSG00000095203	EPB41L4B	8	21	32	13	27
ENSG00000095209	TMEM38B	44	88	40.68	154.65	54
ENSG00000095261	PSMD5	365.8	728.77	424	442	339
ENSG00000095303	PTGS1	2036.46	857.23	191.28	265.53	1365.36
ENSG00000095319	NUP188	748.41	2617	1006	1388	1030
ENSG00000095321	CRAT	1097.71	1112.33	761.23	868.48	830.69
ENSG00000095380	NANS	453	843	585	784	525
ENSG00000095383	TBC1D2	204.11	449.41	348.52	329.15	187.66
ENSG00000095397	WHRN	31	28.43	14.83	65.13	38.76
ENSG00000095485	CWF19L1	93.7	352.27	111.9	176	132.34
ENSG00000095539	SEMA4G	10.84	7	0	9.07	5.69
ENSG00000095564	BTAF1	505.5	308.5	878.45	752	813
ENSG00000095574	IKZF5	57.5	33.5	43	58.5	52
ENSG00000095587	TLL2	1	4	1	0	0
ENSG00000095627	TDRD1	0	0	30	25.86	5
ENSG00000095739	BAMBI	14	32	33	3	5
ENSG00000095752	IL11	0.63	46	16.5	10	3.5
ENSG00000095906	NUBP2	255.52	419.87	343.92	325.2	275.18
ENSG00000095951	HIVEP1	472.17	193.34	281.45	325.4	415.87
ENSG00000096060	FKBP5	11.67	45.67	12	27.67	17.67
ENSG00000096063	SRPK1	297.21	643.93	264.85	400.47	295.33
ENSG00000096070	BRPF3	745.59	653.15	617	656.53	620.11
ENSG00000096080	MRPS18A	92.58	216.06	192.02	153.72	127.51
ENSG00000096092	TMEM14A	10	28	11	16	7
ENSG00000096093	EFHC1	0	62.91	0	45.26	7.83
ENSG00000096384	HSP90AB1	1684	4908.25	2858	2833	2172.25
ENSG00000096401	CDC5L	451	677	547	685	550
ENSG00000096433	ITPR3	753	1676.5	1009	1110.5	1293
ENSG00000096654	ZNF184	46.5	36	44.5	40	35.5
ENSG00000096696	DSP	622.28	456.09	340.56	621.82	526.93
ENSG00000096717	SIRT1	178.41	253.72	163.22	225.49	216.94
ENSG00000096746	HNRNPH3	350.28	695.79	526.02	750.28	520.36
ENSG00000096872	IFT74	38.62	33.59	50.78	47.88	41.81
ENSG00000096968	JAK2	147.32	130.3	187	176	196
ENSG00000096996	IL12RB1	15.41	6	6.1	0	2
ENSG00000097007	ABL1	582.16	574.07	708.03	412.93	420.73
ENSG00000097021	ACOT7	64	718.5	229.48	308.76	190.9
ENSG00000097033	SH3GLB1	798.19	746.24	884.44	800.1	666.71
ENSG00000097046	CDC7	16.53	57.5	16	26.4	28.94
ENSG00000097096	SYDE2	73	48	95	100	64
ENSG00000099194	SCD	3140	736	4844	2349	430
ENSG00000099203	TMED1	255.06	275.07	249.1	253.94	207.12
ENSG00000099204	ABLIM1	0	2.24	3.06	7.6	9.55
ENSG00000099219	ERMP1	48.09	55	91.5	51	42.95
ENSG00000099246	RAB18	398.58	359.26	302.79	384.92	348.68
ENSG00000099250	NRP1	3129.95	1313.81	1732.9	1828.69	1156.3
ENSG00000099256	PRTFDC1	26.96	81.31	74.31	66.92	38.68
ENSG00000099260	PALMD	8.5	0	3	0	2
ENSG00000099284	MACROH2A2	362	386	685	490.48	288
ENSG00000099290	WASHC2A	41.53	2.64	108.96	151.81	104.15
ENSG00000099308	MAST3	185	133.95	148	124	168
ENSG00000099326	MZF1	138.23	71.5	103.31	114	87.92
ENSG00000099330	OCEL1	62.51	53.65	64.46	38	34.79
ENSG00000099331	MYO9B	622.22	1128.42	624.34	723.92	664.27
ENSG00000099337	KCNK6	56	41	60	35	41
ENSG00000099341	PSMD8	79.74	138.37	85.67	125.26	73.39
ENSG00000099364	FBXL19	121.71	151.59	173.5	111.55	68.63
ENSG00000099377	HSD3B7	223.05	455.81	175	246.27	182.83
ENSG00000099381	SETD1A	595	650	423	534.15	468
ENSG00000099385	BCL7C	6.07	15.7	10.57	11.42	4.23
ENSG00000099622	CIRBP	4.15	8.41	4	8.27	6.18
ENSG00000099624	ATP5F1D	104.33	172	125.33	120.67	110.33
ENSG00000099625	CBARP	44.1	20.65	27.21	33.98	21.69
ENSG00000099725	PRKY	21	27	19	14	0
ENSG00000099783	HNRNPM	907.27	1919.24	1202.67	1179.69	793.86
ENSG00000099785	MARCHF2	7.24	12.44	4.11	7.34	1.99
ENSG00000099795	NDUFB7	243	320	337	289	186
ENSG00000099797	TECR	557.78	784.11	574.32	451.03	393.49
ENSG00000099800	TIMM13	65	99	92	63	66
ENSG00000099804	CDC34	180.23	325.33	252.92	244.26	219.81
ENSG00000099810	MTAP	3.88	3.45	21.09	20.84	0
ENSG00000099812	MISP	1	2	18	4	0
ENSG00000099814	CEP170B	497.79	616.43	519.38	644.03	495.85
ENSG00000099817	POLR2E	240.33	395	322	305.33	222
ENSG00000099821	POLRMT	558.99	854	686.36	609	510.77
ENSG00000099822	HCN2	69	66	56	79	54
ENSG00000099834	CDHR5	1.5	0.5	0	1.5	1
ENSG00000099849	RASSF7	0	9.9	18.59	11.04	5.91
ENSG00000099860	GADD45B	50.96	217.59	75	63.2	105.69
ENSG00000099864	PALM	12	0	0	2.08	16
ENSG00000099866	MADCAM1	2	0	2	0	1
ENSG00000099875	MKNK2	196.5	62.87	161.21	296.78	236.64
ENSG00000099899	TRMT2A	138.3	274.35	158.79	164.67	146.8
ENSG00000099901	RANBP1	16.39	64.68	11.79	19.66	0
ENSG00000099904	ZDHHC8	626.45	833.08	636.29	614.84	663.63
ENSG00000099910	KLHL22	455.54	422.16	369.77	321.42	310.3
ENSG00000099917	MED15	399.18	608.87	514.48	468.93	399.28
ENSG00000099940	SNAP29	130	365	267.53	253	254
ENSG00000099942	CRKL	102.5	106	80.5	94	66.5
ENSG00000099949	LZTR1	702.71	975	784.07	349	642
ENSG00000099953	MMP11	294.14	37.16	74.68	31.76	32
ENSG00000099956	SMARCB1	455.69	640.01	589.68	430.73	315.53
ENSG00000099957	P2RX6	12.75	0	31.07	9.84	7
ENSG00000099960	SLC7A4	1	1	2.5	1	0
ENSG00000099968	BCL2L13	1.04	4.2	6.14	3.19	1.05
ENSG00000099974	DDTL	0.7	0	16.74	3.58	2.5
ENSG00000099977	DDT	88.81	150.99	157.65	126.7	108.47
ENSG00000099991	CABIN1	484.74	582.98	355.44	371.41	369.44
ENSG00000099992	TBC1D10A	203.84	308.81	306.9	285.09	234.95
ENSG00000099994	SUSD2	286	4	14	5	3
ENSG00000099995	SF3A1	882	1433	843	926.72	748
ENSG00000099999	RNF215	51.99	117	110.96	95.97	78.79
ENSG00000100003	SEC14L2	53.05	126.94	50.7	37.31	37.69
ENSG00000100014	SPECC1L	427.28	499.57	370.02	429.2	410.96
ENSG00000100023	PPIL2	99.2	125.79	88.38	96	86.33
ENSG00000100028	SNRPD3	35	75	42.33	50	30.67
ENSG00000100029	PES1	23.72	82.73	20.94	45.4	18.19
ENSG00000100030	MAPK1	279	395.5	302	351	322.5
ENSG00000100031	GGT1	4.31	0	6.4	0	1.37
ENSG00000100034	PPM1F	350	619.3	301.77	310.31	310.31
ENSG00000100038	TOP3B	112.61	151.15	94.89	154.58	110.11
ENSG00000100056	ESS2	235.91	340	200.65	246	255
ENSG00000100065	CARD10	32.27	153.52	25.46	33	33
ENSG00000100075	SLC25A1	873	1189.17	1072	852.91	554
ENSG00000100077	GRK3	0	28	22	16	14
ENSG00000100078	PLA2G3	1	4	3	0	0
ENSG00000100083	GGA1	246.65	543.58	389.52	386.66	346.83
ENSG00000100084	HIRA	669	619	659	587	547
ENSG00000100097	LGALS1	9190	9640	11402	10338	7553
ENSG00000100099	HPS4	118.65	119.81	130.34	145.67	131.8
ENSG00000100100	PIK3IP1	0	14.53	3.84	12.85	0
ENSG00000100101	RP1-37E16.12	34.62	95.8	18.41	26.11	52.34
ENSG00000100104	SRRD	66	161	111	109	71
ENSG00000100105	PATZ1	44.79	44.7	67.74	30.55	36.75
ENSG00000100106	TRIOBP	30.39	16.5	27.86	12.72	16.44
ENSG00000100109	TFIP11	93.14	150.64	97.64	108.26	93.2
ENSG00000100124	ANKRD54	47.06	106.68	100.26	73.47	61.59
ENSG00000100129	EIF3L	1835.64	1670.78	1813.16	2266.93	1710.08
ENSG00000100138	SNU13	208.39	332.45	213.46	282.04	221.64
ENSG00000100139	MICALL1	474.21	989.06	644.01	772.08	696.77
ENSG00000100142	POLR2F	0.73	0.8	0	0	0.77
ENSG00000100147	CCDC134	23	64	15	33	19
ENSG00000100150	DEPDC5	48.88	68.1	75.36	67.34	47.59
ENSG00000100151	PICK1	17.83	51.48	59	29	17
ENSG00000100154	TTC28	582.95	319.82	508.21	507.75	545.36
ENSG00000100156	SLC16A8	8	2	2	3	2
ENSG00000100162	CENPM	0	187	12	76.03	46.36
ENSG00000100167	SEPTIN3	27.57	4.77	0	9.13	1.42
ENSG00000100196	KDELR3	453.84	532.5	436.05	503.07	354.46
ENSG00000100201	DDX17	658.13	424.71	382.9	384.4	412.93
ENSG00000100207	TCF20	3.83	5.4	15.29	7.88	10.64
ENSG00000100209	HSCB	58.11	73.41	82.47	63.05	56
ENSG00000100211	CBY1	8.64	0.6	0.01	13.85	2.73
ENSG00000100216	TOMM22	222	509	343	346	255
ENSG00000100219	XBP1	524.66	380.98	1121.84	942.8	675.36
ENSG00000100220	RTCB	804	1363	1002	994	780
ENSG00000100221	JOSD1	117.96	170.09	134.31	186.8	173.15
ENSG00000100225	FBXO7	842.31	991.94	922.25	795.81	720.94
ENSG00000100226	GTPBP1	404.65	501.5	424.06	385.9	363.71
ENSG00000100227	POLDIP3	47.92	120.86	43.33	58.16	35.75
ENSG00000100228	RAB36	24	40	31	47	40
ENSG00000100234	TIMP3	1494	914	5510	1532	1625
ENSG00000100239	PPP6R2	120.17	0	0	93.06	115.18
ENSG00000100241	SBF1	2103.8	2150.55	2216.15	2207.74	2113.84
ENSG00000100242	SUN2	800	1547.14	776.5	1019.7	853.46
ENSG00000100243	CYB5R3	2879.97	2829.85	1975.1	2527.55	2867.02
ENSG00000100246	DNAL4	12	7	4	9	6
ENSG00000100258	LMF2	2079.55	3263.69	1914.14	2112.5	2016.96
ENSG00000100263	RHBDD3	152.81	134	262	189	144
ENSG00000100266	PACSIN2	109.54	281.12	151.67	189.68	154.72
ENSG00000100271	TTLL1	102	82	116	123	123
ENSG00000100280	AP1B1	21.59	68.71	33.21	23.51	25.99
ENSG00000100284	TOM1	167.54	88.25	121.66	120.26	96.04
ENSG00000100285	NEFH	11	46	25	16	19
ENSG00000100288	CHKB	115	100	154	189	119
ENSG00000100292	HMOX1	801.65	293.91	1061.21	1106.45	859.94
ENSG00000100294	MCAT	81.3	155.55	121.62	86.36	115.71
ENSG00000100296	THOC5	91.67	148.88	97.26	113.9	105.46
ENSG00000100297	MCM5	99	2851.36	228.69	952.17	834
ENSG00000100299	ARSA	229	145	197.5	160.42	177.93
ENSG00000100302	RASD2	0	3	2	1	0
ENSG00000100304	TTLL12	286	889	458	724	529
ENSG00000100307	CBX7	54	45.42	25.88	27.93	29.88
ENSG00000100316	RPL3	25014.12	20921.15	27762.92	23903.96	21750.13
ENSG00000100319	ZMAT5	62	60	52	53	39
ENSG00000100320	RBFOX2	552.44	462.3	426.15	427.69	346.77
ENSG00000100324	TAB1	360	336	275	248	219
ENSG00000100330	MTMR3	63.41	41.29	55.11	36.94	34.08
ENSG00000100335	MIEF1	82.02	157.73	98.81	132.43	90.87
ENSG00000100336	APOL4	13	0	2	0	0.5
ENSG00000100342	APOL1	81.76	21.08	46.75	66.72	4.17
ENSG00000100344	PNPLA3	3	0	2.43	2	0
ENSG00000100345	MYH9	33914	47714	50538	52662.78	32542
ENSG00000100347	SAMM50	524	1160	595	531	547
ENSG00000100348	TXN2	107	182.5	122.5	126	89.4
ENSG00000100350	FOXRED2	41	97.37	37.92	94.85	63.9
ENSG00000100353	EIF3D	1146.5	1369.5	1194.5	1286.48	1069
ENSG00000100354	TNRC6B	4.66	0	2.12	3.52	9.71
ENSG00000100359	SGSM3	496.09	604.23	522.73	409.55	370.36
ENSG00000100360	IFT27	39.52	54.86	54.71	42	44.89
ENSG00000100364	KIAA0930	318.24	310.8	188.99	176.75	309.7
ENSG00000100372	SLC25A17	3.27	5.68	0	0	4.87
ENSG00000100376	FAM118A	31.57	47.78	56.58	43.85	31.1
ENSG00000100379	KCTD17	73.48	77.22	99.2	62.73	26.56
ENSG00000100380	ST13	2345.5	1987	2281	2334.86	2025
ENSG00000100387	RBX1	265	381	298	239	205
ENSG00000100393	EP300	2060.15	1356.28	1526.27	1659.86	1593.48
ENSG00000100395	L3MBTL2	217.4	445.04	296.77	291	249.08
ENSG00000100399	CHADL	2.6	10.61	13.05	2.58	11
ENSG00000100401	RANGAP1	415.64	1706.02	743.19	743.33	536.89
ENSG00000100403	ZC3H7B	4200	3799	4929	2647	2138
ENSG00000100410	PHF5A	32	81	48	55	52
ENSG00000100412	ACO2	12.96	6.08	12.72	18.89	0
ENSG00000100413	POLR3H	18.5	63.41	38.99	34.93	42.59
ENSG00000100416	TRMU	123.99	208.53	152.54	136.54	133.11
ENSG00000100417	PMM1	453	719	394	478	492
ENSG00000100418	DESI1	68	137	154	121	57
ENSG00000100422	CERK	510	580	289	475	383
ENSG00000100425	BRD1	163.81	149.61	99.78	85.87	86.54
ENSG00000100426	ZBED4	289	359	272	360	251
ENSG00000100429	HDAC10	162.58	157.73	188.98	97.6	112.3
ENSG00000100439	ABHD4	488	137.72	478	465.64	441.14
ENSG00000100441	KHNYN	184.33	182.14	160.08	141.05	142.94
ENSG00000100442	FKBP3	157.5	359	264	235	192
ENSG00000100445	SDR39U1	69.02	31.88	23.69	47.47	38.84
ENSG00000100461	RBM23	123.38	193.37	108.14	130.77	105
ENSG00000100462	PRMT5	15.85	0	8.36	43.14	0
ENSG00000100473	COCH	1.38	5.63	0	7.21	0.18
ENSG00000100478	AP4S1	3.81	2.07	4.04	1.58	0
ENSG00000100483	VCPKMT	12.48	10.43	21.36	18.75	18.81
ENSG00000100485	SOS2	301.56	246.97	258.55	319.88	345.47
ENSG00000100490	CDKL1	8.13	87	29	47	29.34
ENSG00000100503	NIN	466.83	318.8	421.42	680.01	345.34
ENSG00000100504	PYGL	25.16	0	17.5	0	16.93
ENSG00000100519	PSMC6	327.69	508.19	660.52	389.82	361.65
ENSG00000100522	GNPNAT1	0	0	27.67	10.18	29.94
ENSG00000100526	CDKN3	0	11.23	0	7.27	2.03
ENSG00000100528	CNIH1	264	340.73	301.15	390	344.89
ENSG00000100532	CGRRF1	74.76	78.79	105.44	73.83	69.79
ENSG00000100554	ATP6V1D	122.57	237.42	201.02	166.51	164.23
ENSG00000100558	PLEK2	3	46.82	16.26	5	4
ENSG00000100567	PSMA3	331	572	676	533.92	381.38
ENSG00000100568	VTI1B	515.81	734.51	626.59	604.15	518.63
ENSG00000100575	TIMM9	4	4	2.5	2.5	1.5
ENSG00000100577	GSTZ1	18.15	67.51	76.83	37.66	47.53
ENSG00000100578	KIAA0586	46.92	262.18	43.37	0	0
ENSG00000100580	TMED8	30	32	36	31	28
ENSG00000100583	SAMD15	7	26	7	11	8
ENSG00000100591	AHSA1	600.45	1093.61	698.4	726.76	687
ENSG00000100592	DAAM1	161	63	118	119	112
ENSG00000100596	SPTLC2	288	450	223	352	315
ENSG00000100599	RIN3	897.39	427.07	463.69	439.19	500.56
ENSG00000100600	LGMN	218.58	128.6	85.48	101.42	283.93
ENSG00000100601	ALKBH1	65.34	115.09	68.58	72.79	65.55
ENSG00000100603	SNW1	756.03	781.31	748.8	858.36	589.51
ENSG00000100605	ITPK1	92.98	162.4	65	80.54	92.97
ENSG00000100612	DHRS7	231.66	194.63	283.03	249.34	128.12
ENSG00000100614	PPM1A	191.92	87.33	171.09	195.83	200.14
ENSG00000100625	SIX4	354.83	110.36	135.67	202.03	171.84
ENSG00000100626	GALNT16	14.5	9	13.5	19	36.5
ENSG00000100628	ASB2	2	17	0	7	0
ENSG00000100632	ERH	184	402	230	238	186
ENSG00000100644	HIF1A	2073.27	2025.16	3245.95	2856.72	2393.28
ENSG00000100647	SUSD6	81	82	121	107	94
ENSG00000100650	SRSF5	253.85	291.56	261.99	234	181.1
ENSG00000100664	EIF5	309.76	511.77	533.67	635.5	548
ENSG00000100697	DICER1	149.46	109.76	115.42	159.22	148.57
ENSG00000100711	ZFYVE21	0	8.57	2	2.2	6.97
ENSG00000100714	MTHFD1	13.02	46.25	46.91	130.93	109.38
ENSG00000100722	ZC3H14	152.06	142.55	159.35	308.81	129.71
ENSG00000100726	TELO2	292	1225.85	359.78	563.95	450
ENSG00000100731	PCNX1	1108.42	878.94	951.7	943.67	785.96
ENSG00000100744	GSKIP	8.25	6.75	8.31	5	6.65
ENSG00000100749	VRK1	28	256	53	111.74	86.13
ENSG00000100764	PSMC1	790.23	2199.4	1506	1500.63	1016.68
ENSG00000100784	RPS6KA5	13.39	19.13	19.57	0	0
ENSG00000100796	PPP4R3A	241.58	261.55	237.47	302.72	169.11
ENSG00000100802	C14orf93	42.19	25.09	9.47	16.21	20.94
ENSG00000100804	PSMB5	1185.36	1932.44	1713.1	1528.67	1077.39
ENSG00000100811	YY1	807.62	816.51	761.37	766.05	677
ENSG00000100813	ACIN1	1149.13	1220.47	772.2	895.64	866.68
ENSG00000100814	CCNB1IP1	30.5	18.23	36.7	29.54	31.48
ENSG00000100815	TRIP11	761.3	427.98	719.59	810.97	712.26
ENSG00000100823	APEX1	296.42	521.81	403.64	365.3	288.91
ENSG00000100836	PABPN1	962.52	1100.47	888.27	848.09	743.89
ENSG00000100842	EFS	112.31	74.94	35.95	0	40.86
ENSG00000100852	ARHGAP5	385.12	197.59	389.18	404.74	348.23
ENSG00000100865	CINP	0	79.91	38.83	55.84	20.96
ENSG00000100883	SRP54	187.07	301.01	314.59	305.93	202.65
ENSG00000100888	CHD8	150.91	233.89	138.6	223.81	120.08
ENSG00000100889	PCK2	29.97	0	59.28	38.56	63.48
ENSG00000100890	PRORP	49.04	140.28	57.09	66.68	75.94
ENSG00000100897	DCAF11	168.43	214.51	221.93	230.27	203.02
ENSG00000100906	NFKBIA	281.15	247.4	416.46	299.7	166.26
ENSG00000100908	EMC9	18.5	84	26.17	33.99	18.39
ENSG00000100911	PSME2	415.85	947.35	1506.37	835.76	344.94
ENSG00000100918	REC8	4.52	3.26	10.61	3.48	5.34
ENSG00000100926	TM9SF1	463.52	519.55	484.02	487.31	678.65
ENSG00000100934	SEC23A	2531.49	2127.59	2493.09	2093.96	1560.26
ENSG00000100938	GMPR2	353.89	330.29	463.57	289.42	266.95
ENSG00000100941	PNN	937.95	792.94	827.87	755.34	875.62
ENSG00000100949	RABGGTA	50	109.91	102	92.04	64.96
ENSG00000100968	NFATC4	2138.09	410.8	597.5	688.98	1034.48
ENSG00000100979	PLTP	287.5	154.17	206.6	186.04	115.71
ENSG00000100982	PCIF1	384.18	438.21	472.13	412.94	450
ENSG00000100983	GSS	126.37	293.45	198.53	232.07	180.7
ENSG00000100991	TRPC4AP	1245.43	1360.77	1350.99	1318.37	1129.43
ENSG00000100994	PYGB	1364	1985	1902	1104	1084
ENSG00000100997	ABHD12	32.93	233.6	111.31	28.43	29.57
ENSG00000101003	GINS1	1	92	3	12	21
ENSG00000101004	NINL	308.06	105	275	101	85
ENSG00000101019	UQCC1	0	4.24	2.31	4.04	2.15
ENSG00000101052	IFT52	210	173.5	215	199.5	207
ENSG00000101079	NDRG3	281.95	200.51	226.57	105.62	142.95
ENSG00000101084	RAB5IF	44.73	106.7	86.91	75.64	49
ENSG00000101096	NFATC2	12.34	6	1.5	0	1
ENSG00000101104	PABPC1L	6.15	5.96	17.05	14.54	13.67
ENSG00000101109	STK4	206	277.75	198.25	310.51	199
ENSG00000101115	SALL4	3.77	2.16	18.72	16.35	14.94
ENSG00000101126	ADNP	218.59	212.41	213.2	175.4	174.39
ENSG00000101134	DOK5	2.07	37.6	0	12	153.74
ENSG00000101138	CSTF1	164.26	342.44	178	235	158.91
ENSG00000101146	RAE1	54.31	119.34	79.33	69.54	55.57
ENSG00000101150	TPD52L2	15.8	57.92	34.25	62.59	44.49
ENSG00000101152	DNAJC5	196	339.42	197.04	196	158
ENSG00000101158	NELFCD	168.89	100.47	0	0	168.74
ENSG00000101160	CTSZ	3764	2251	2017	1868	1915
ENSG00000101161	PRPF6	1449	1850	1363	1526	1272
ENSG00000101162	TUBB1	1	6	2	2	0
ENSG00000101166	PRELID3B	93	123.41	175.42	174.95	125.86
ENSG00000101181	MTG2	175.19	227.73	213.52	213.77	195
ENSG00000101182	PSMA7	1042.28	2478.19	1957.5	1765.39	1181.34
ENSG00000101187	SLCO4A1	27.92	16.76	17.5	8.9	3.1
ENSG00000101188	NTSR1	12	2	1	8	6
ENSG00000101189	MRGBP	120	119	114	113	108
ENSG00000101190	TCFL5	221.2	181.05	149.99	138.96	149.35
ENSG00000101191	DIDO1	517.46	472.35	410.3	492.47	500.41
ENSG00000101193	GID8	171	186	156	195	160
ENSG00000101194	SLC17A9	160.79	411.97	257.81	163.05	112.44
ENSG00000101210	EEF1A2	2.37	35	2	0	13
ENSG00000101213	PTK6	0	2	8	0	1
ENSG00000101216	GMEB2	30.21	85.95	63.55	38.63	60.27
ENSG00000101220	C20orf27	50.09	160.7	73.44	88	71.23
ENSG00000101224	CDC25B	10.15	0.29	58.45	0	0
ENSG00000101230	ISM1	260	47	28	37	86
ENSG00000101236	RNF24	0	0	6.11	4.03	2.69
ENSG00000101246	ARFRP1	7.05	11.7	0.96	4.88	3.25
ENSG00000101247	NDUFAF5	34.45	62.99	29.89	37.82	38.11
ENSG00000101255	TRIB3	9.83	6.14	49.62	34.37	32.37
ENSG00000101265	RASSF2	93.5	33	25.5	26	56
ENSG00000101266	CSNK2A1	50.82	90.4	77.05	61.11	57.75
ENSG00000101290	CDS2	286	292.93	290	261	187
ENSG00000101294	HM13	3.84	49.41	37.67	14.41	65.15
ENSG00000101298	SNPH	60.62	25.27	55.56	25.42	25.3
ENSG00000101307	SIRPB1	1.08	0	6.93	4.11	4.91
ENSG00000101310	SEC23B	85.04	201	151.02	143.9	116.25
ENSG00000101311	FERMT1	13.67	68.7	49.66	16.1	15
ENSG00000101333	PLCB4	86.81	342.51	375.46	447.4	168.46
ENSG00000101335	MYL9	1784	3560.52	4233.22	3378.36	2457.3
ENSG00000101337	TM9SF4	982	930.21	1102.86	903.32	796.73
ENSG00000101343	CRNKL1	229.87	240.83	294.95	349.84	319.39
ENSG00000101346	POFUT1	274	766	509	459	407
ENSG00000101347	SAMHD1	285.5	175.11	421.2	108.02	87.25
ENSG00000101350	KIF3B	629	636	580	689	638
ENSG00000101361	NOP56	618	1710.55	898	1224	825.68
ENSG00000101363	MANBAL	1.75	3.25	4	2.75	3.25
ENSG00000101367	MAPRE1	241	1215	517	657	432
ENSG00000101384	JAG1	563	143	391	104	536
ENSG00000101400	SNTA1	298	333	167	281	352
ENSG00000101407	TTI1	67	152.67	86.33	92.33	83.67
ENSG00000101412	E2F1	12	597	59	215	133
ENSG00000101413	RPRD1B	72	130	102	134.56	100
ENSG00000101417	PXMP4	26.31	72	38	27	32
ENSG00000101421	CHMP4B	588	740	696	610	606
ENSG00000101439	CST3	348.67	169.67	154.67	198.33	245.67
ENSG00000101442	ACTR5	61	122	95	68	82
ENSG00000101447	FAM83D	17.33	1686	75	453	284
ENSG00000101452	DHX35	91.31	127.23	113.17	90.2	76.15
ENSG00000101457	DNTTIP1	209.31	436.86	318.64	301.59	265
ENSG00000101464	PIGU	98	314.7	150.14	219.78	166
ENSG00000101470	TNNC2	2.65	2	3	0	1
ENSG00000101473	ACOT8	126.9	197.55	176.46	151.96	109.49
ENSG00000101474	APMAP	779	1435.46	1056.49	1026	824.27
ENSG00000101493	ZNF516	509.11	224.35	399.58	359.47	376.42
ENSG00000101542	CDH20	0.67	0.33	0	0.33	0
ENSG00000101544	ADNP2	182	455	231.86	370	231.41
ENSG00000101546	RBFA	149.47	269.79	140.82	146.9	159.21
ENSG00000101557	USP14	411.39	950.96	681.09	603.55	549.73
ENSG00000101558	VAPA	534.81	718.71	624.49	667.68	527.67
ENSG00000101577	LPIN2	739.85	497.27	775.99	723.42	492.75
ENSG00000101596	SMCHD1	645.11	705.78	713.08	1035.86	913.05
ENSG00000101608	MYL12A	888	2115	2058	1750	1153
ENSG00000101624	CEP76	50.15	132	26.51	63.82	64.65
ENSG00000101639	CEP192	57.38	18.15	0	8.52	66.38
ENSG00000101654	RNMT	40.7	22.55	40.02	41.5	34.72
ENSG00000101665	SMAD7	115.31	103.84	59.33	117.24	86.61
ENSG00000101670	LIPG	0	1	4.18	0	2
ENSG00000101680	LAMA1	132	636	243	617	252
ENSG00000101745	ANKRD12	164.04	126.73	295.13	213.77	275.45
ENSG00000101752	MIB1	550	406	502	530	406
ENSG00000101773	RBBP8	59.4	152.83	96.91	178.26	181.01
ENSG00000101782	RIOK3	332.68	312	377	424	413
ENSG00000101811	CSTF2	132.67	441.21	178	227	147.79
ENSG00000101825	MXRA5	13902	1684	7341	3061	467
ENSG00000101843	PSMD10	203.17	280.11	210.3	267.12	182.44
ENSG00000101849	TBL1X	57.05	65.34	74.45	40.33	28.46
ENSG00000101868	POLA1	0	582	96	295	262
ENSG00000101871	MID1	42.76	61.08	49.45	62.34	58.97
ENSG00000101882	NKAP	193	188	192	219	178
ENSG00000101888	NXT2	0	8.27	7.55	4.25	0
ENSG00000101898	MCTS2P	10	13	4	9	14
ENSG00000101901	ALG13	54.15	81.2	160.65	212.9	33.52
ENSG00000101911	PRPS2	101.4	239.77	117.97	141.79	139.68
ENSG00000101928	MOSPD1	16.31	22.02	28.45	18.78	25.1
ENSG00000101938	CHRDL1	8	41.53	3	0	45.16
ENSG00000101940	WDR13	444.9	304.63	367	307.5	335.22
ENSG00000101966	XIAP	34.67	31.33	66	56.33	46
ENSG00000101972	STAG2	282.47	194.51	304.29	303.19	267.65
ENSG00000101974	ATP11C	19.48	22.13	40.49	11.84	0
ENSG00000101986	ABCD1	365.88	303	259.98	210.95	258.94
ENSG00000101997	CCDC22	172	249	135	186	207
ENSG00000102003	SYP	4	0	1	1.5	0.96
ENSG00000102007	PLP2	120	387	185.94	255	300
ENSG00000102024	PLS3	1106.5	1059.5	1061.65	1157.19	862.5
ENSG00000102030	NAA10	272.49	518.47	433.12	382.75	379.15
ENSG00000102032	RENBP	16	15.79	36.84	39	32
ENSG00000102034	ELF4	181	265.5	181	215	179.9
ENSG00000102038	SMARCA1	132.81	306.89	508.83	273.98	56.94
ENSG00000102043	MTMR8	0	4	8	2	0
ENSG00000102048	ASB9	4.94	6.81	0.74	1.76	0
ENSG00000102053	ZC3H12B	38	8	10	14	10
ENSG00000102054	RBBP7	618.58	1359.08	716.72	838.93	964.63
ENSG00000102057	KCND1	31.09	23.89	13	4.41	4
ENSG00000102078	SLC25A14	30	82	46.32	46	38
ENSG00000102081	FMR1	0	18.48	6.91	18.58	43.35
ENSG00000102096	PIM2	19	50	30	22	17
ENSG00000102098	SCML2	24.99	71.07	29	53.09	48.26
ENSG00000102100	SLC35A2	111.28	101.31	139.84	74.1	99.82
ENSG00000102103	PQBP1	42.67	66.96	48.18	50.99	41.4
ENSG00000102109	PCSK1N	9	0	23	4	7
ENSG00000102119	EMD	482	989	764	622.73	529
ENSG00000102128	RAB40AL	3.18	0	0	1	2
ENSG00000102144	PGK1	195.75	102.62	196.75	548.62	49.38
ENSG00000102158	MAGT1	186.94	218.21	324.5	94.53	171.15
ENSG00000102172	SMS	272.92	1691.55	601.27	832.48	717.21
ENSG00000102174	PHEX	1	2	5	2	9
ENSG00000102178	UBL4A	70	124	68	73	66
ENSG00000102189	EEA1	877	512	728	826	762
ENSG00000102218	RP2	120	197	143	200	168
ENSG00000102221	JADE3	27.7	58	34.58	54.76	44.22
ENSG00000102225	CDK16	470.74	628.83	270.29	796.63	667.38
ENSG00000102226	USP11	303.67	243.23	283.15	363.65	384.57
ENSG00000102241	HTATSF1	277.54	385.6	273.05	335.9	302.55
ENSG00000102265	TIMP1	5745.41	4953.37	3317.8	5836.94	6499.56
ENSG00000102287	GABRE	116	6	28	9	24
ENSG00000102302	FGD1	585	493	364	405	356
ENSG00000102309	PIN4	5.33	4.26	9.66	3.85	2.36
ENSG00000102312	PORCN	8.66	17.89	6.64	8.03	2.63
ENSG00000102316	MAGED2	626.78	556.2	760.2	526.5	425.4
ENSG00000102317	RBM3	465.76	850.9	425.57	583.29	453.08
ENSG00000102349	KLF8	17.49	2	1.99	0	7
ENSG00000102359	SRPX2	280.76	272.86	409.93	222	157.09
ENSG00000102362	SYTL4	9	36.42	10.34	16.33	9.67
ENSG00000102384	CENPI	3.5	211.18	16.5	58.48	32.72
ENSG00000102385	DRP2	24.33	19.03	13.5	12.89	3.71
ENSG00000102390	PBDC1	89.92	159.23	135.18	141.25	84.95
ENSG00000102393	GLA	179.47	389.41	189	159.78	136.38
ENSG00000102401	ARMCX3	286.42	143.67	233.67	226.44	190.67
ENSG00000102409	BEX4	6.5	11.5	21.5	12.5	22
ENSG00000102452	NALCN	14	10.84	17	20.62	19.54
ENSG00000102471	NDFIP2	88.97	108.5	139.73	137.5	127.82
ENSG00000102524	TNFSF13B	62.92	1.63	20	4.83	2
ENSG00000102531	FNDC3A	465.5	396.01	423.12	503.94	296.26
ENSG00000102543	CDADC1	60	52.3	51	47.27	58.98
ENSG00000102547	CAB39L	25.55	15.17	16.87	8.78	12.39
ENSG00000102554	KLF5	28.11	32.22	56.77	73.93	40.21
ENSG00000102572	STK24	616.35	1004.09	834.52	914.5	758.23
ENSG00000102575	ACP5	95.75	0.89	4	1.32	2
ENSG00000102580	DNAJC3	390	309.92	435.23	441	276
ENSG00000102595	UGGT2	457.35	373.23	612.08	683.74	774.26
ENSG00000102606	ARHGEF7	0	4.13	3.64	13.51	3.59
ENSG00000102683	SGCG	3	3	0	12	24
ENSG00000102699	PARP4	2017	2366	2006	2077	1608
ENSG00000102710	SUPT20H	8.74	25.35	73.47	15.41	0
ENSG00000102738	MRPS31	66	175	99	120	91
ENSG00000102743	SLC25A15	32	94	41	39	35
ENSG00000102753	KPNA3	400.76	698.04	575.9	619.4	479.78
ENSG00000102755	FLT1	36.57	0	21.47	37.22	61.8
ENSG00000102760	RGCC	41	42	183	196	54
ENSG00000102763	VWA8	426	251.48	416.55	241	269
ENSG00000102781	KATNAL1	61	116.5	61.62	77.56	86
ENSG00000102786	INTS6	125.1	75.1	358.45	71.25	0
ENSG00000102796	DHRS12	33.47	11.64	18.78	18.64	13.95
ENSG00000102802	MEDAG	34	19	1	7	9.3
ENSG00000102804	TSC22D1	1609.19	634.8	971.1	1302.66	839.96
ENSG00000102854	MSLN	6.76	7.54	3.08	0	0
ENSG00000102858	MGRN1	0.86	14.09	0	0	12.72
ENSG00000102870	ZNF629	359	433	361	332	278
ENSG00000102871	TRADD	214	245	257.61	220	198
ENSG00000102878	HSF4	25.73	8.62	0	10.74	11.79
ENSG00000102879	CORO1A	2.51	14.13	4.27	2.48	1.5
ENSG00000102882	MAPK3	2.95	8.52	5.76	0	10.41
ENSG00000102886	GDPD3	15	11	3	7	11
ENSG00000102893	PHKB	454.83	387.87	322.86	317.59	353.14
ENSG00000102897	LYRM1	3.5	4	3.83	4.83	3.5
ENSG00000102898	NUTF2	20.02	53.55	26.87	31.59	23.85
ENSG00000102900	NUP93	389.54	1083.58	378.09	467.19	445.04
ENSG00000102901	CENPT	163.58	523.86	152.29	227.23	272.95
ENSG00000102904	TSNAXIP1	9.9	2.67	2.57	5.19	1
ENSG00000102910	LONP2	582.03	983.46	811.46	660.22	629.39
ENSG00000102921	N4BP1	459	411.51	441	418.59	379
ENSG00000102931	ARL2BP	203.23	219.2	148.66	161.72	141.61
ENSG00000102935	ZNF423	35	5.5	3.5	2	1
ENSG00000102967	DHODH	13.14	99.17	35	33.1	45.68
ENSG00000102974	CTCF	70.16	121.58	65.85	85.18	80.92
ENSG00000102977	ACD	83.7	94.97	57.59	125.51	115.01
ENSG00000102978	POLR2C	312	521	349	338	300
ENSG00000102981	PARD6A	0	2.46	6.99	4.47	8.67
ENSG00000102984	ZNF821	44.5	10.58	31.68	14.45	14.5
ENSG00000102996	MMP15	51	28	61	66	50
ENSG00000103018	CYB5B	181	363	268	212.93	150
ENSG00000103021	CCDC113	6.19	30.83	22.74	37.93	27.92
ENSG00000103023	PRSS54	0	16	8	4	5
ENSG00000103024	NME3	174.9	149.88	190.94	93.91	92.98
ENSG00000103035	PSMD7	666	1295	1093.28	1123	820.45
ENSG00000103037	SETD6	9.8	29.95	6.44	4	12.47
ENSG00000103042	SLC38A7	48.45	63.08	89.25	130.4	104.37
ENSG00000103043	VAC14	377.81	544.66	524.1	925.15	533.78
ENSG00000103044	HAS3	3.22	42.5	3	4.03	5.5
ENSG00000103047	TANGO6	163	481	219	289	230
ENSG00000103051	COG4	78.88	80.24	70.04	54.9	43.45
ENSG00000103061	SLC7A6OS	105.78	147.77	89	98.77	79.15
ENSG00000103064	SLC7A6	120.26	110.24	114.08	97.96	94.24
ENSG00000103066	PLA2G15	290.17	292.85	221.79	274.8	206.34
ENSG00000103067	ESRP2	1	0	15	0	1
ENSG00000103091	WDR59	348.59	369.97	301.85	277.44	350.35
ENSG00000103111	MON1B	235.11	234.49	270.19	230.28	262.93
ENSG00000103126	AXIN1	93.15	117.92	106.24	120.89	110.82
ENSG00000103145	HCFC1R1	240.53	50.49	102.04	63.8	66.59
ENSG00000103148	NPRL3	98.9	138.94	139.24	155.43	121.12
ENSG00000103152	MPG	612.02	496.1	734.02	597.89	527.37
ENSG00000103154	NECAB2	0	0	3	6	4
ENSG00000103160	HSDL1	71.42	88.53	108.02	116.9	83.77
ENSG00000103168	TAF1C	11.81	20.88	26.65	32.26	36.73
ENSG00000103174	NAGPA	265.1	238	293	222.96	194.32
ENSG00000103175	WFDC1	1	7.5	3.5	1.5	2.5
ENSG00000103184	SEC14L5	8.13	1	2	0	0
ENSG00000103187	COTL1	141	639	432.66	409.96	303.55
ENSG00000103194	USP10	462	1251.47	757.51	866.1	583
ENSG00000103196	CRISPLD2	363.89	381.12	549.53	200.57	87.37
ENSG00000103199	ZNF500	120.62	99.14	117.02	94.5	49.34
ENSG00000103226	NOMO3	426.04	1514.45	82.29	1284.02	658.62
[truncated: 10,145 more rows]
